# Supplementary material for: Identification of Potentially Pathogenic Variants Associated with Recurrence in Medication-Related Osteonecrosis of the Jaw (MRONJ) Patients Using Whole-Exome Sequencing
Source: MDPI journal article supplement (doi:10.3390/jcm11082145), 2022-04-12
Supplement: s1 [file s1]

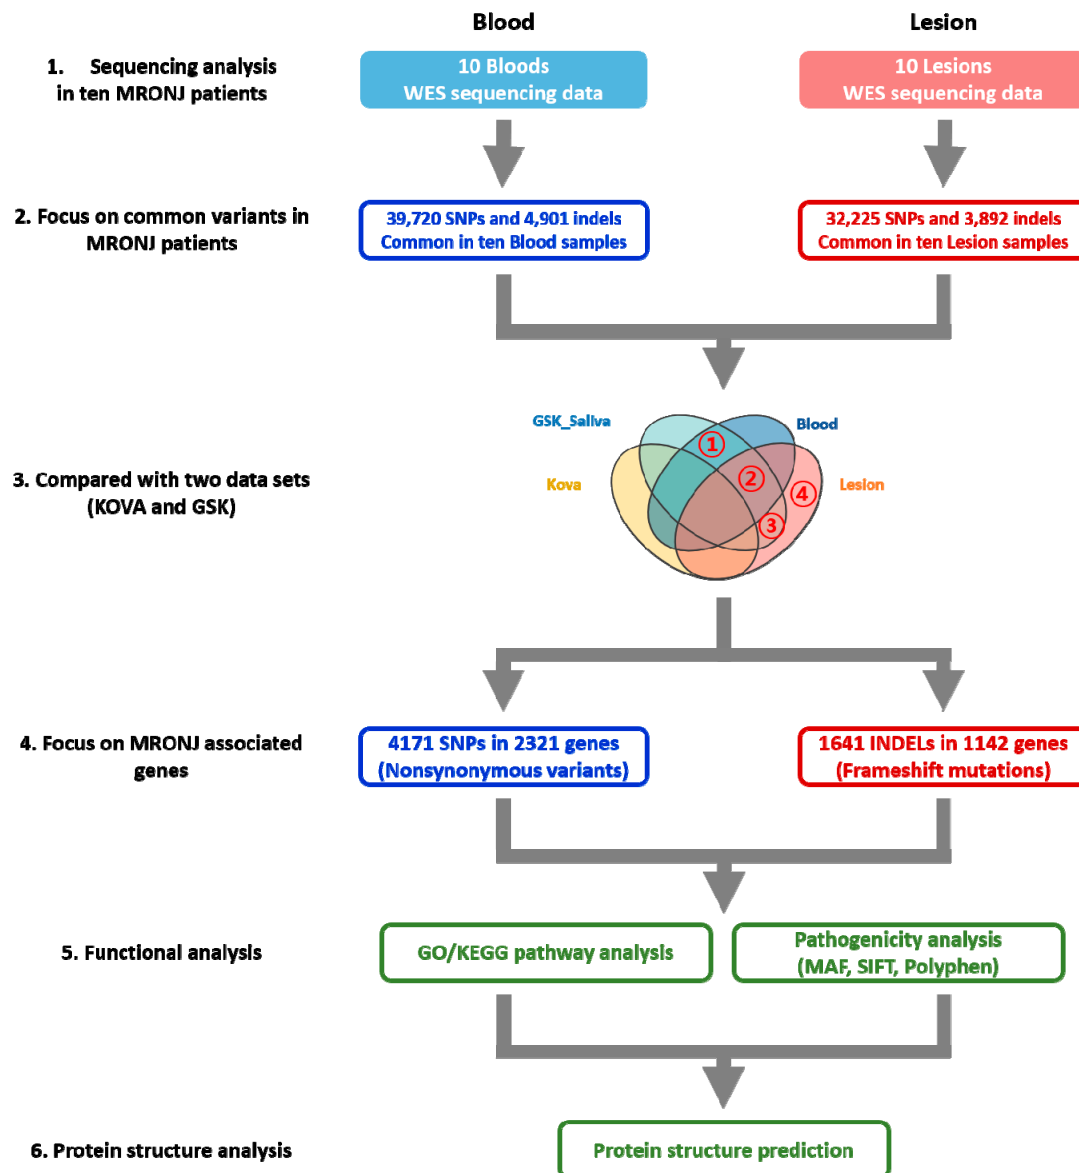

**Figure S1:** Outline of experimental design and analysis workflow for this study.

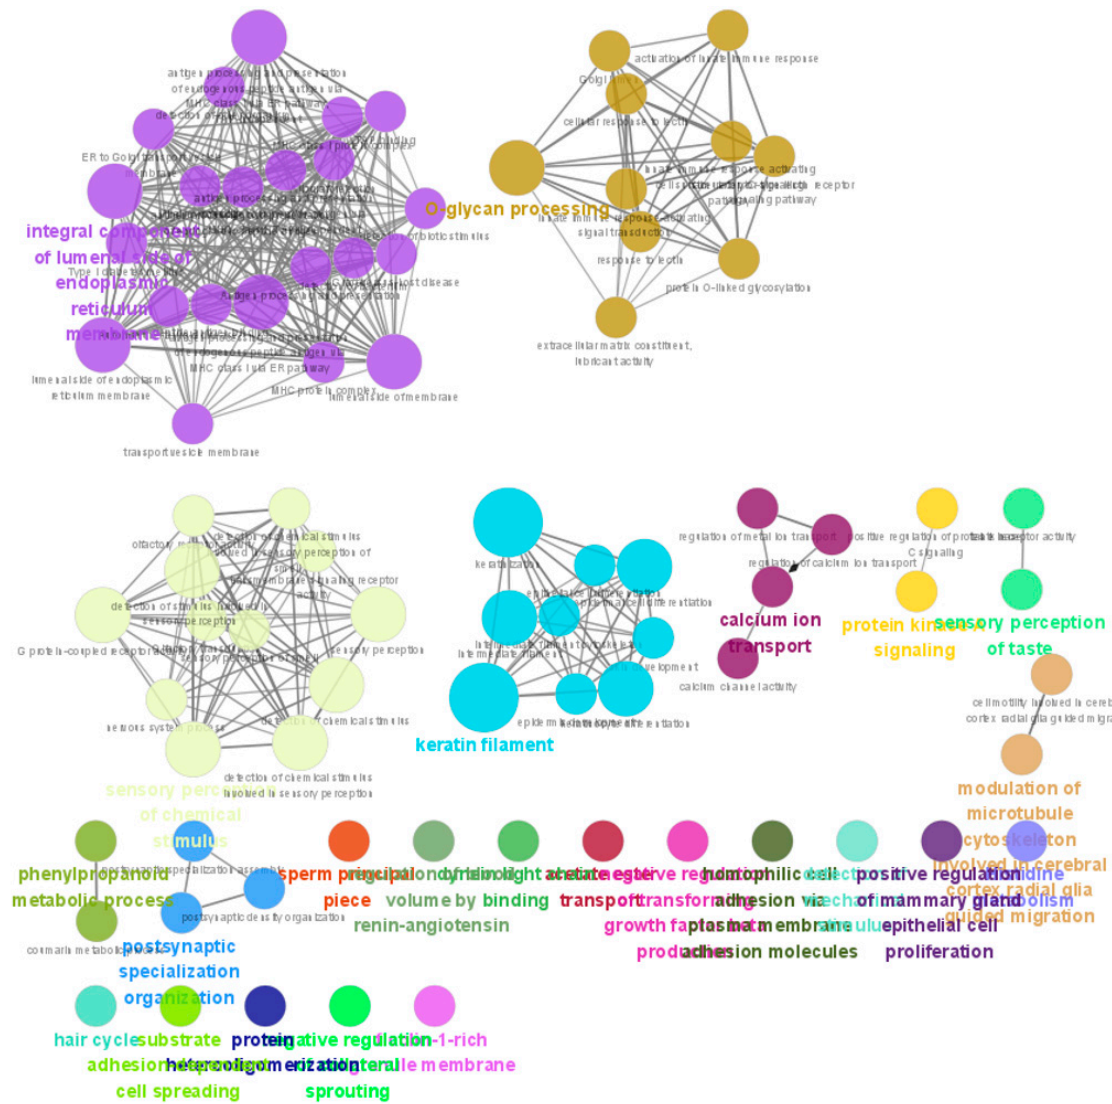

**Figure S2:** Molecular enrichment networks analysis of genes associated with MRONJ.
