# Supplementary material for: Identification of Potentially Pathogenic Variants Associated with Recurrence in Medication-Related Osteonecrosis of the Jaw (MRONJ) Patients Using Whole-Exome Sequencing
Source: J Clin Med. 2022 Apr 12;11(8):2145. doi: 10.3390/jcm11082145 (PMC9030961; doi:10.3390/jcm11082145)
Supplement: Supplementary file 1 [file jcm-11-02145-s001.zip › Supplementary Table 1.xlsx]

## Sheet: Supple Table 1
Supplementary Table 1. Statistics of sequencing quality, mapping, coverage and depth
Sample Type	Sample name	Raw reads	Raw data(G)	Effective(%)	Error(%)	Q20(%)	Q30(%)	GC(%)	Total		Duplicate		Mapped		Properly mapped		PE mapped		SE mapped		With mate mapped to a different chr		With mate mapped to a different chr ((mapQ>=5))		Initial_bases_ on_target	Initial_bases_ on_or_near_target	Total_effective _yield(Mb)	Effective_yield _on_target(Mb)	Fraction_of_effective _bases_on_target	Fraction_of_effective _bases_on_or_near_target	Average_sequencing _depth_on_target	Bases_covered _on_target	Coverage_of _target_region	Fraction_of_target_ covered_with_at_least_100x	Fraction_of_target _covered_with_at_least_50x	Fraction_of_target _covered_with_at_least_20x	Fraction_of_target _covered_with_at_least_10x	Fraction_of_target _covered_with_at_least_4x
Blood	B2	38808762	11.6	98.1	0.04	94.22	87.06	52.55	76141436	(100%)	12982079	(17.11%)	75862043	(99.63%)	75054764	(98.57%)	75612260	(99.31%)	499566	(0.66%)	463436	(0.61%)	389007	(0.51%)	60456963	136297444	11262.6	6788.1	0.603	0.781	112.28	60366413	0.999	0.39	0.718	0.941	0.98	0.995
	B4	37028108	11.1	98.09	0.03	95.7	89.73	51.28	72645022	(100%)	12004231	(16.55%)	72537796	(99.85%)	72002804	(99.12%)	72446484	(99.73%)	182624	(0.25%)	377258	(0.52%)	318945	(0.44%)	60456963	136297444	10808.2	6223.67	0.576	0.753	102.94	60215767	0.996	0.372	0.73	0.942	0.978	0.992
	B5	40634824	12.2	96.78	0.03	96.76	91.93	50.91	78656112	(100%)	13822466	(17.60%)	78532038	(99.84%)	77907358	(99.05%)	78428562	(99.71%)	206952	(0.26%)	442048	(0.56%)	373458	(0.47%)	60456963	136297444	11697.8	6408.46	0.548	0.706	106	60201585	0.996	0.386	0.741	0.94	0.976	0.991
	B6	39668038	11.9	96.93	0.03	96.62	91.64	51.73	76918266	(100%)	13781390	(17.95%)	76781320	(99.82%)	76128446	(98.97%)	76664274	(99.67%)	234092	(0.30%)	445956	(0.58%)	376725	(0.49%)	60456963	136297444	11426.6	6467.91	0.566	0.724	106.98	60204219	0.996	0.379	0.72	0.936	0.974	0.991
	B7	36598586	11	97.48	0.03	95.22	88.91	52.06	71353802	(100%)	12858127	(18.07%)	71165495	(99.74%)	70528030	(98.84%)	71025988	(99.54%)	279014	(0.39%)	430512	(0.60%)	366736	(0.51%)	60456963	136297444	10590.5	6418.72	0.606	0.78	106.17	60206808	0.996	0.378	0.723	0.938	0.975	0.991
	B8	47686239	14.3	97.59	0.03	95.56	89.52	52.31	93076228	(100%)	16438436	(17.69%)	92915917	(99.83%)	92077878	(98.93%)	92780890	(99.68%)	270054	(0.29%)	549872	(0.59%)	459377	(0.49%)	60456963	136297444	13823.1	7143.13	0.517	0.663	118.15	60219294	0.996	0.394	0.682	0.934	0.978	0.992
	B10	33808311	10.1	97.25	0.025	96.81	91.99	50.645	65767276	(100%)	10954121	(16.68%)	65679088	(99.87%)	65202370	(99.14%)	65603266	(99.75%)	151644	(0.23%)	335880	(0.51%)	278586	(0.42%)	60456963	136297444	9786.49	5257.54	0.537	0.701	86.96	60205712	0.996	0.293	0.656	0.924	0.972	0.991
	B11	32193707	9.7	98.19	0.03	97.48	93.53	54.72	63224430	(100%)	11006166	(17.43%)	63154341	(99.89%)	62669186	(99.12%)	63100116	(99.80%)	108450	(0.17%)	348770	(0.55%)	291505	(0.46%)	60456963	136297444	9407.4	5820.08	0.619	0.793	96.27	60188700	0.996	0.322	0.569	0.887	0.965	0.989
	B15	29915692	9	98.3	0.03	97.59	93.71	52.72	58814868	(100%)	10005683	(17.03%)	58760883	(99.91%)	58242084	(99.03%)	58718522	(99.84%)	84722	(0.14%)	408526	(0.69%)	352476	(0.60%)	60456963	136297444	8759.1	5185.82	0.592	0.772	85.78	60193513	0.996	0.284	0.597	0.909	0.969	0.99
	B16	45553440	13.7	97.75	0.03	95.56	89.5	51.41	89053070	(100%)	15896107	(17.88%)	88895208	(99.82%)	88118878	(98.95%)	88764870	(99.68%)	260676	(0.29%)	525346	(0.59%)	447262	(0.50%)	60456963	136297444	13236.7	7587.8	0.573	0.743	125.51	60225369	0.996	0.465	0.798	0.955	0.982	0.993
Lesion	L2	20395088	6.1	96.66	0.03	96.85	92.1	54.33	39426500	(100%)	7747522	(21.08%)	36747096	(93.20%)	36504010	(92.59%)	36644092	(92.94%)	206008	(0.52%)	109454	(0.28%)	83056	(0.21%)	60456963	136297444	5250.38	3371.28	0.642	0.811	55.76	60143314	0.995	0.155	0.374	0.754	0.914	0.976
	L4	41274986	12.4	96.83	0.03	97.88	94.4	51.1	79930936	(100%)	15583712	(19.96%)	78092357	(97.70%)	76747532	(96.02%)	77934882	(97.50%)	314950	(0.39%)	1068618	(1.34%)	959542	(1.20%)	60456963	136297444	11481.4	6571.9	0.572	0.735	108.7	60199745	0.996	0.4	0.751	0.94	0.975	0.991
	L5	35298619	10.6	98.6	0.03	97.78	94.15	51.73	69606770	(100%)	13841144	(20.83%)	66460507	(95.48%)	65801878	(94.53%)	66296032	(95.24%)	328950	(0.47%)	392712	(0.56%)	333342	(0.48%)	60456963	136297444	9639.15	5568.84	0.578	0.749	92.11	60196711	0.996	0.314	0.663	0.924	0.972	0.99
	L6	59740392	17.9	96.9	0.03	96.8	92.05	54.58	115773314	(100%)	25815236	(22.39%)	115313947	(99.60%)	114013298	(98.48%)	115174294	(99.48%)	279306	(0.24%)	993098	(0.86%)	868288	(0.75%)	60456963	136297444	17140.7	10733.7	0.626	0.785	177.54	60222873	0.996	0.529	0.812	0.958	0.982	0.993
	L7	16288116	4.9	96.58	0.03	97.78	94.15	51.86	31463352	(100%)	5684748	(20.04%)	28373545	(90.18%)	28005974	(89.01%)	28210758	(89.66%)	325574	(1.03%)	174918	(0.56%)	146251	(0.46%)	60456963	136297444	3952.99	2394.88	0.606	0.767	39.61	59812642	0.989	0.061	0.258	0.698	0.887	0.963
	L8	38751029	11.6	98.93	0.03	97.62	93.8	52.09	76670862	(100%)	14409053	(21.89%)	65814095	(85.84%)	65187730	(85.02%)	65582974	(85.54%)	462242	(0.60%)	322860	(0.42%)	269713	(0.35%)	60456963	136297444	9783.68	5654.8	0.578	0.748	93.53	60186994	0.996	0.313	0.632	0.917	0.97	0.99
	L10	24813468	7.4	95.22	0.03	97.09	92.56	53.3	47254024	(100%)	8239255	(18.03%)	45696317	(96.70%)	45408868	(96.10%)	45610586	(96.52%)	171462	(0.36%)	164840	(0.35%)	133715	(0.28%)	60456963	136297444	6643.6	4205.84	0.633	0.795	69.57	60076492	0.994	0.214	0.486	0.851	0.946	0.981
	L11	34081356	10.2	99.21	0.03	97.34	93.14	51.9	67623234	(100%)	12702004	(20.33%)	62488214	(92.41%)	61880680	(91.51%)	62321892	(92.16%)	332644	(0.49%)	306208	(0.45%)	253409	(0.37%)	60456963	136297444	9307.5	5412.66	0.582	0.756	89.53	60187457	0.996	0.3	0.633	0.918	0.97	0.99
	L15	39404389	11.8	96.22	0.03	96.71	91.83	54.05	75832746	(100%)	17247157	(23.06%)	74785069	(98.62%)	74255488	(97.92%)	74651392	(98.44%)	267354	(0.35%)	303378	(0.40%)	244972	(0.32%)	60456963	136297444	11029.8	7036.06	0.638	0.807	116.38	60185243	0.996	0.383	0.686	0.929	0.973	0.99
	L16	68816382	20.6	99.44	0.03	97.74	94.11	53.16	136865700	(100%)	29878679	(22.10%)	135189600	(98.78%)	134044022	(97.94%)	135015958	(98.65%)	347284	(0.25%)	833338	(0.61%)	716411	(0.52%)	60456963	136297444	20056.2	11694.4	0.583	0.77	193.43	60243857	0.996	0.621	0.885	0.977	0.991	0.995
