# Supplementary material for: Identification of Potentially Pathogenic Variants Associated with Recurrence in Medication-Related Osteonecrosis of the Jaw (MRONJ) Patients Using Whole-Exome Sequencing
Source: J Clin Med. 2022 Apr 12;11(8):2145. doi: 10.3390/jcm11082145 (PMC9030961; doi:10.3390/jcm11082145)
Supplement: Supplementary file 1 [file jcm-11-02145-s001.zip › Supplementary Table 2.xlsx]

## Sheet: Supple Table 2
Supplementary Table 2. The number of variants identified from ten patients
Type		SNPs																	Indels
Sample		CDS	Synonymous	Missense	Stop gain	Stop loss	Unknown	Intronic	3'UTR	5'UTR	Splicing	ncRNA exonic	ncRNA intronic	ncRNA splicing	Upstream	Downstream	Intergenic	Total	CDS	frameshift deletion	frameshift insertion	non frameshift deletion	non frameshift insertion	Stop gain	Stop loss	Unknown	Intronic	3'UTR	5'UTR	Splicing	ncRNA exonic	ncRNA intronic	ncRNA splicing	Upstream	Downstream	Intergenic	Total
Blood	B2	22542	11488	10493	87	10	472	164524	5586	2986	75	3432	17830	13	4429	3112	150991	375782	716	120	94	199	193	7	1	106	28127	1013	519	85	406	3046	4	775	536	23187	58462
	B4	22623	11531	10488	79	8	525	175198	5803	2915	79	3592	19436	18	4570	3241	167775	405524	714	114	115	213	167	7	1	103	31913	1115	503	86	434	3554	3	834	580	28243	68031
	B5	22172	11287	10323	84	9	476	200780	5920	3012	70	3743	23850	14	4702	3728	216267	484521	711	117	95	216	176	4	0	107	38808	1204	504	86	469	4594	3	927	780	39814	87956
	B6	22498	11448	10448	80	10	520	185432	5742	3073	79	3657	21298	20	4775	3373	194972	445181	716	129	96	206	174	7	0	108	35218	1146	520	87	453	4072	2	973	664	35047	78954
	B7	22559	11486	10473	82	10	515	154180	5184	2860	69	3299	16486	16	3978	2680	139549	351099	721	130	95	204	186	3	1	105	28317	924	511	88	396	3089	1	748	516	23977	59329
	B8	22552	11353	10582	79	7	538	271215	7560	3659	66	4585	33843	21	7285	5418	320937	677518	745	130	104	209	190	9	1	108	45775	1367	620	95	513	5484	2	1322	959	49185	106134
	B10	22621	11461	10572	87	7	504	180618	5855	2903	78	3508	20588	14	4414	3301	187595	431721	685	107	91	202	177	6	2	105	33952	1117	485	94	422	3890	1	867	649	32703	74909
	B11	22770	11546	10633	83	10	508	149841	5442	3184	79	3491	15975	19	4667	2718	131497	339932	729	134	101	198	184	10	0	107	26427	924	547	86	417	2684	1	885	512	21337	54593
	B15	22404	11388	10461	78	8	479	152467	5413	2901	79	3297	15796	12	4192	2627	132484	341935	712	107	100	210	190	6	2	102	27554	977	513	92	400	2872	2	767	499	22263	56695
	B16	22404	11452	10438	78	6	441	204493	6238	3212	72	3727	22831	18	5200	3838	210461	482807	707	115	98	209	185	5	0	99	37563	1133	537	76	478	4275	4	1009	725	35918	82475
Lesion	L2	22389	11364	10453	82	10	487	86720	3782	2481	69	2738	8187	12	2599	1411	58749	189320	791	135	133	202	197	21	1	106	18996	735	485	78	329	1900	3	581	374	14584	38912
	L4	22659	11557	10515	77	8	510	189093	5779	2933	82	3613	21431	18	4737	3501	190103	444233	733	108	122	215	179	11	1	103	43698	1259	535	88	500	5094	4	1083	880	44160	98102
	L5	22164	11270	10326	84	9	481	161947	5379	2939	69	3462	17726	14	4212	2878	150683	371706	748	123	107	222	180	12	0	108	36796	1163	535	89	470	4198	2	990	710	34918	80672
	L6	22551	11448	10496	79	11	525	223733	6477	3581	82	3982	25401	20	6446	4472	236154	533235	726	127	96	205	186	7	0	109	42348	1257	614	97	499	4803	3	1279	881	41792	94380
	L7	22138	11283	10251	82	9	520	76616	3384	2205	61	2547	7063	11	2008	1117	49944	167252	798	149	143	188	195	20	1	105	19676	686	420	82	347	2060	1	502	312	16196	41117
	L8	22583	11380	10592	82	7	529	161982	5433	3048	67	3486	17590	13	4580	3023	153115	375167	752	129	112	202	195	10	1	109	33160	1102	533	93	413	3712	2	929	646	30904	72292
	L10	22596	11444	10565	87	7	503	104993	4267	2598	78	2974	10201	13	3029	1776	82493	235215	746	113	116	210	190	12	2	108	23409	844	477	89	359	2333	1	622	466	19716	49109
	L11	22722	11537	10597	81	9	507	156751	5471	2986	79	3408	16980	19	4280	2928	142903	358775	739	131	108	206	182	11	0	106	31085	1043	517	89	423	3398	1	888	597	27646	66475
	L15	22412	11388	10453	79	8	491	147232	5113	2952	81	3229	14883	11	4216	2776	128533	331694	718	110	97	207	190	6	2	111	29817	959	558	95	402	3095	2	826	557	25044	62130
	L16	22387	11448	10426	80	6	438	281006	7906	3816	75	4353	32019	18	7892	5857	305740	671460	727	119	96	220	186	7	0	103	55480	1624	673	80	583	6271	4	1661	1155	55633	123963
