# Supplementary material for: Identification of Potentially Pathogenic Variants Associated with Recurrence in Medication-Related Osteonecrosis of the Jaw (MRONJ) Patients Using Whole-Exome Sequencing
Source: J Clin Med. 2022 Apr 12;11(8):2145. doi: 10.3390/jcm11082145 (PMC9030961; doi:10.3390/jcm11082145)
Supplement: Supplementary file 1 [file jcm-11-02145-s001.zip › Supplementary Table 5.xlsx]

## Sheet: BP
Supplementary Table 5. Enrichment of GO terms and KEGG pathways of MRONJ-associated genes.
GroupID		Category	Term	Description	LogP	Log(q-value)	InTerm_InList	Genes	Symbols
1_Summary		GO Biological Processes	GO:0051606	detection of stimulus	-8.51717	-4.32221	45/717	706,3105,3106,3123,7096,7273,7287,25861,26333,26533,54825,79544,80036,81472,83756,83862,84059,114780,127064,127077,135941,168507,219870,219959,254973,259289,259295,338662,338751,342372,353164,390058,390264,390265,390538,391189,391190,391195,391196,392390,401666,401994,403257,441669,442361,6339,119395,255022	TSPO,HLA-A,HLA-B,HLA-DRB1,TLR1,TTN,TULP1,WHRN,OR7A17,OR10G3,CDHR2,OR4K1,TRPM3,OR2C3,TAS1R3,TMEM120A,ADGRV1,PKD1L2,OR2T12,OR2T11,OR2A14,PKD1L1,OR10G9,OR1S1,OR1L4,TAS2R43,TAS2R20,OR8D4,OR52L1,PKD1L3,TAS2R42,OR51B6,OR10G4,OR10G7,OR4M2,OR11L1,OR2L8,OR2T33,OR2M7,OR1L6,OR51A4,OR14I1,OR4C45,OR4Q3,OR2A2,SCNN1D,CALHM3,CALHM1
	1_Member	GO Biological Processes	GO:0051606	detection of stimulus	-8.51717	-4.32221	45/717	706,3105,3106,3123,7096,7273,7287,25861,26333,26533,54825,79544,80036,81472,83756,83862,84059,114780,127064,127077,135941,168507,219870,219959,254973,259289,259295,338662,338751,342372,353164,390058,390264,390265,390538,391189,391190,391195,391196,392390,401666,401994,403257,441669,442361	TSPO,HLA-A,HLA-B,HLA-DRB1,TLR1,TTN,TULP1,WHRN,OR7A17,OR10G3,CDHR2,OR4K1,TRPM3,OR2C3,TAS1R3,TMEM120A,ADGRV1,PKD1L2,OR2T12,OR2T11,OR2A14,PKD1L1,OR10G9,OR1S1,OR1L4,TAS2R43,TAS2R20,OR8D4,OR52L1,PKD1L3,TAS2R42,OR51B6,OR10G4,OR10G7,OR4M2,OR11L1,OR2L8,OR2T33,OR2M7,OR1L6,OR51A4,OR14I1,OR4C45,OR4Q3,OR2A2
	1_Member	GO Biological Processes	GO:0050906	detection of stimulus involved in sensory perception	-7.04826	-3.33043	35/542	7287,25861,26333,26533,79544,81472,83756,83862,84059,127064,127077,135941,219870,219959,254973,259289,259295,338662,338751,342372,353164,390058,390264,390265,390538,391189,391190,391195,391196,392390,401666,401994,403257,441669,442361	TULP1,WHRN,OR7A17,OR10G3,OR4K1,OR2C3,TAS1R3,TMEM120A,ADGRV1,OR2T12,OR2T11,OR2A14,OR10G9,OR1S1,OR1L4,TAS2R43,TAS2R20,OR8D4,OR52L1,PKD1L3,TAS2R42,OR51B6,OR10G4,OR10G7,OR4M2,OR11L1,OR2L8,OR2T33,OR2M7,OR1L6,OR51A4,OR14I1,OR4C45,OR4Q3,OR2A2
	1_Member	GO Biological Processes	GO:0007606	sensory perception of chemical stimulus	-6.79671	-3.20381	34/530	6339,26333,26533,79544,81472,83756,119395,127064,127077,135941,219870,219959,254973,255022,259289,259295,338662,338751,342372,353164,390058,390264,390265,390538,391189,391190,391195,391196,392390,401666,401994,403257,441669,442361	SCNN1D,OR7A17,OR10G3,OR4K1,OR2C3,TAS1R3,CALHM3,OR2T12,OR2T11,OR2A14,OR10G9,OR1S1,OR1L4,CALHM1,TAS2R43,TAS2R20,OR8D4,OR52L1,PKD1L3,TAS2R42,OR51B6,OR10G4,OR10G7,OR4M2,OR11L1,OR2L8,OR2T33,OR2M7,OR1L6,OR51A4,OR14I1,OR4C45,OR4Q3,OR2A2
	1_Member	GO Biological Processes	GO:0050907	detection of chemical stimulus involved in sensory perception	-6.33242	-2.87727	31/479	26333,26533,79544,81472,83756,127064,127077,135941,219870,219959,254973,259289,259295,338662,338751,342372,353164,390058,390264,390265,390538,391189,391190,391195,391196,392390,401666,401994,403257,441669,442361	OR7A17,OR10G3,OR4K1,OR2C3,TAS1R3,OR2T12,OR2T11,OR2A14,OR10G9,OR1S1,OR1L4,TAS2R43,TAS2R20,OR8D4,OR52L1,PKD1L3,TAS2R42,OR51B6,OR10G4,OR10G7,OR4M2,OR11L1,OR2L8,OR2T33,OR2M7,OR1L6,OR51A4,OR14I1,OR4C45,OR4Q3,OR2A2
	1_Member	GO Biological Processes	GO:0009593	detection of chemical stimulus	-6.16608	-2.81622	32/513	7096,26333,26533,79544,81472,83756,127064,127077,135941,219870,219959,254973,259289,259295,338662,338751,342372,353164,390058,390264,390265,390538,391189,391190,391195,391196,392390,401666,401994,403257,441669,442361	TLR1,OR7A17,OR10G3,OR4K1,OR2C3,TAS1R3,OR2T12,OR2T11,OR2A14,OR10G9,OR1S1,OR1L4,TAS2R43,TAS2R20,OR8D4,OR52L1,PKD1L3,TAS2R42,OR51B6,OR10G4,OR10G7,OR4M2,OR11L1,OR2L8,OR2T33,OR2M7,OR1L6,OR51A4,OR14I1,OR4C45,OR4Q3,OR2A2
	1_Member	GO Biological Processes	GO:0050911	detection of chemical stimulus involved in sensory perception of smell	-4.88793	-1.80692	26/430	26333,26533,79544,81472,127064,127077,135941,219870,219959,254973,338662,338751,390058,390264,390265,390538,391189,391190,391195,391196,392390,401666,401994,403257,441669,442361	OR7A17,OR10G3,OR4K1,OR2C3,OR2T12,OR2T11,OR2A14,OR10G9,OR1S1,OR1L4,OR8D4,OR52L1,OR51B6,OR10G4,OR10G7,OR4M2,OR11L1,OR2L8,OR2T33,OR2M7,OR1L6,OR51A4,OR14I1,OR4C45,OR4Q3,OR2A2
	1_Member	GO Biological Processes	GO:0007608	sensory perception of smell	-4.48496	-1.46609	26/454	26333,26533,79544,81472,127064,127077,135941,219870,219959,254973,338662,338751,390058,390264,390265,390538,391189,391190,391195,391196,392390,401666,401994,403257,441669,442361	OR7A17,OR10G3,OR4K1,OR2C3,OR2T12,OR2T11,OR2A14,OR10G9,OR1S1,OR1L4,OR8D4,OR52L1,OR51B6,OR10G4,OR10G7,OR4M2,OR11L1,OR2L8,OR2T33,OR2M7,OR1L6,OR51A4,OR14I1,OR4C45,OR4Q3,OR2A2
2_Summary		GO Biological Processes	GO:0031424	keratinization	-7.68323	-3.7893	22/225	1823,3713,3861,5046,7053,8687,23254,51535,81871,83899,85280,85285,353323,353333,386675,386676,386682,386683,653240,728224,728318,100132386,3204,11078,25861,80736,1490,3123,3911,1277,1278,6939,4838,5697,5802,6382,10411,27134,54768,54825,79583,84913,124093,163183	DSC1,IVL,KRT14,PCSK6,TGM3,KRT38,KAZN,PPHLN1,KRTAP4-6,KRTAP9-2,KRTAP9-4,KRTAP4-1,KRTAP12-2,KRTAP10-10,KRTAP10-7,KRTAP10-9,KRTAP10-3,KRTAP12-3,KRTAP4-11,KRTAP4-8,KRTAP9-1,KRTAP4-9,HOXA7,TRIOBP,WHRN,SLC44A4,CCN2,HLA-DRB1,LAMA5,COL1A1,COL1A2,TCF15,NODAL,PYY,PTPRS,SDC1,RAPGEF3,TJP3,HYDIN,CDHR2,TMEM231,ATOH8,CCDC78,SYNE4
	2_Member	GO Biological Processes	GO:0031424	keratinization	-7.68323	-3.7893	22/225	1823,3713,3861,5046,7053,8687,23254,51535,81871,83899,85280,85285,353323,353333,386675,386676,386682,386683,653240,728224,728318,100132386	DSC1,IVL,KRT14,PCSK6,TGM3,KRT38,KAZN,PPHLN1,KRTAP4-6,KRTAP9-2,KRTAP9-4,KRTAP4-1,KRTAP12-2,KRTAP10-10,KRTAP10-7,KRTAP10-9,KRTAP10-3,KRTAP12-3,KRTAP4-11,KRTAP4-8,KRTAP9-1,KRTAP4-9
	2_Member	GO Biological Processes	GO:0009913	epidermal cell differentiation	-6.29408	-2.87727	26/360	1823,3204,3713,3861,5046,7053,8687,11078,23254,25861,51535,80736,81871,83899,85280,85285,353323,353333,386675,386676,386682,386683,653240,728224,728318,100132386	DSC1,HOXA7,IVL,KRT14,PCSK6,TGM3,KRT38,TRIOBP,KAZN,WHRN,PPHLN1,SLC44A4,KRTAP4-6,KRTAP9-2,KRTAP9-4,KRTAP4-1,KRTAP12-2,KRTAP10-10,KRTAP10-7,KRTAP10-9,KRTAP10-3,KRTAP12-3,KRTAP4-11,KRTAP4-8,KRTAP9-1,KRTAP4-9
	2_Member	GO Biological Processes	GO:0030216	keratinocyte differentiation	-6.03353	-2.74166	23/302	1823,3204,3713,3861,5046,7053,8687,23254,51535,81871,83899,85280,85285,353323,353333,386675,386676,386682,386683,653240,728224,728318,100132386	DSC1,HOXA7,IVL,KRT14,PCSK6,TGM3,KRT38,KAZN,PPHLN1,KRTAP4-6,KRTAP9-2,KRTAP9-4,KRTAP4-1,KRTAP12-2,KRTAP10-10,KRTAP10-7,KRTAP10-9,KRTAP10-3,KRTAP12-3,KRTAP4-11,KRTAP4-8,KRTAP9-1,KRTAP4-9
	2_Member	GO Biological Processes	GO:0008544	epidermis development	-5.68046	-2.48551	29/463	1490,1823,3123,3204,3713,3861,3911,5046,7053,8687,11078,23254,25861,51535,80736,81871,83899,85280,85285,353323,353333,386675,386676,386682,386683,653240,728224,728318,100132386	CCN2,DSC1,HLA-DRB1,HOXA7,IVL,KRT14,LAMA5,PCSK6,TGM3,KRT38,TRIOBP,KAZN,WHRN,PPHLN1,SLC44A4,KRTAP4-6,KRTAP9-2,KRTAP9-4,KRTAP4-1,KRTAP12-2,KRTAP10-10,KRTAP10-7,KRTAP10-9,KRTAP10-3,KRTAP12-3,KRTAP4-11,KRTAP4-8,KRTAP9-1,KRTAP4-9
	2_Member	GO Biological Processes	GO:0043588	skin development	-5.63771	-2.48414	27/415	1277,1278,1823,3204,3713,3861,3911,5046,6939,7053,8687,23254,51535,81871,83899,85280,85285,353323,353333,386675,386676,386682,386683,653240,728224,728318,100132386	COL1A1,COL1A2,DSC1,HOXA7,IVL,KRT14,LAMA5,PCSK6,TCF15,TGM3,KRT38,KAZN,PPHLN1,KRTAP4-6,KRTAP9-2,KRTAP9-4,KRTAP4-1,KRTAP12-2,KRTAP10-10,KRTAP10-7,KRTAP10-9,KRTAP10-3,KRTAP12-3,KRTAP4-11,KRTAP4-8,KRTAP9-1,KRTAP4-9
	2_Member	GO Biological Processes	GO:0030855	epithelial cell differentiation	-5.00043	-1.88466	39/781	1823,3204,3713,3861,4838,5046,5697,5802,6382,6939,7053,8687,10411,11078,23254,25861,27134,51535,54768,54825,79583,80736,81871,83899,84913,85280,85285,124093,163183,353323,353333,386675,386676,386682,386683,653240,728224,728318,100132386	DSC1,HOXA7,IVL,KRT14,NODAL,PCSK6,PYY,PTPRS,SDC1,TCF15,TGM3,KRT38,RAPGEF3,TRIOBP,KAZN,WHRN,TJP3,PPHLN1,HYDIN,CDHR2,TMEM231,SLC44A4,KRTAP4-6,KRTAP9-2,ATOH8,KRTAP9-4,KRTAP4-1,CCDC78,SYNE4,KRTAP12-2,KRTAP10-10,KRTAP10-7,KRTAP10-9,KRTAP10-3,KRTAP12-3,KRTAP4-11,KRTAP4-8,KRTAP9-1,KRTAP4-9
3_Summary		GO Biological Processes	GO:0006816	calcium ion transport	-5.7569	-2.51618	27/409	706,774,930,1490,2859,4308,4985,5027,6373,7226,7466,8911,8912,9001,9454,10288,10345,57190,64072,80036,114780,162514,168507,255022,255057,283229,342372,55630,3768,6339,6534,9152,9963,23479,83959,285335,348932,100134444	TSPO,CACNA1B,CD19,CCN2,GPR35,TRPM1,OPRD1,P2RX7,CXCL11,TRPM2,WFS1,CACNA1I,CACNA1H,HAP1,HOMER3,LILRB2,TRDN,SELENON,CDH23,TRPM3,PKD1L2,TRPV3,PKD1L1,CALHM1,CBARP,CRACR2B,PKD1L3,SLC39A4,KCNJ12,SCNN1D,SLC6A7,SLC6A5,SLC23A1,ISCU,SLC4A11,SLC9C1,SLC6A18,KCNJ18
	3_Member	GO Biological Processes	GO:0006816	calcium ion transport	-5.7569	-2.51618	27/409	706,774,930,1490,2859,4308,4985,5027,6373,7226,7466,8911,8912,9001,9454,10288,10345,57190,64072,80036,114780,162514,168507,255022,255057,283229,342372	TSPO,CACNA1B,CD19,CCN2,GPR35,TRPM1,OPRD1,P2RX7,CXCL11,TRPM2,WFS1,CACNA1I,CACNA1H,HAP1,HOMER3,LILRB2,TRDN,SELENON,CDH23,TRPM3,PKD1L2,TRPV3,PKD1L1,CALHM1,CBARP,CRACR2B,PKD1L3
	3_Member	GO Biological Processes	GO:0030001	metal ion transport	-4.83038	-1.78155	28/486	706,774,930,1490,2859,4308,4985,5027,6373,7226,7466,8911,8912,9001,9454,10288,10345,55630,57190,64072,80036,114780,162514,168507,255022,255057,283229,342372	TSPO,CACNA1B,CD19,CCN2,GPR35,TRPM1,OPRD1,P2RX7,CXCL11,TRPM2,WFS1,CACNA1I,CACNA1H,HAP1,HOMER3,LILRB2,TRDN,SLC39A4,SELENON,CDH23,TRPM3,PKD1L2,TRPV3,PKD1L1,CALHM1,CBARP,CRACR2B,PKD1L3
	3_Member	GO Biological Processes	GO:0070588	calcium ion transmembrane transport	-3.92023	-0.98054	19/304	774,930,2859,4308,5027,6373,7226,8911,8912,9001,10345,57190,80036,114780,162514,168507,255022,255057,342372	CACNA1B,CD19,GPR35,TRPM1,P2RX7,CXCL11,TRPM2,CACNA1I,CACNA1H,HAP1,TRDN,SELENON,TRPM3,PKD1L2,TRPV3,PKD1L1,CALHM1,CBARP,PKD1L3
	3_Member	GO Biological Processes	GO:0051924	regulation of calcium ion transport	-3.25621	-0.574621	15/238	706,930,2859,4985,5027,6373,7466,9001,9454,10288,10345,57190,162514,255057,283229	TSPO,CD19,GPR35,OPRD1,P2RX7,CXCL11,WFS1,HAP1,HOMER3,LILRB2,TRDN,SELENON,TRPV3,CBARP,CRACR2B
	3_Member	GO Biological Processes	GO:0010959	regulation of metal ion transport	-3.09065	-0.529876	15/247	706,930,2859,4985,5027,6373,7466,9001,9454,10288,10345,57190,162514,255057,283229	TSPO,CD19,GPR35,OPRD1,P2RX7,CXCL11,WFS1,HAP1,HOMER3,LILRB2,TRDN,SELENON,TRPV3,CBARP,CRACR2B
	3_Member	GO Biological Processes	GO:0098662	inorganic cation transmembrane transport	-2.29286	-0.0569405	30/769	774,930,2859,3768,4308,5027,6339,6373,6534,7226,8911,8912,9001,9152,9963,10345,23479,55630,57190,80036,83959,114780,162514,168507,255022,255057,285335,342372,348932,100134444	CACNA1B,CD19,GPR35,KCNJ12,TRPM1,P2RX7,SCNN1D,CXCL11,SLC6A7,TRPM2,CACNA1I,CACNA1H,HAP1,SLC6A5,SLC23A1,TRDN,ISCU,SLC39A4,SELENON,TRPM3,SLC4A11,PKD1L2,TRPV3,PKD1L1,CALHM1,CBARP,SLC9C1,PKD1L3,SLC6A18,KCNJ18
	3_Member	GO Biological Processes	GO:0051928	positive regulation of calcium ion transport	-2.16623	0	8/118	706,930,5027,6373,7466,9001,10345,162514	TSPO,CD19,P2RX7,CXCL11,WFS1,HAP1,TRDN,TRPV3
	3_Member	GO Biological Processes	GO:0010524	positive regulation of calcium ion transport into cytosol	-2.09638	0	5/53	930,5027,6373,9001,10345	CD19,P2RX7,CXCL11,HAP1,TRDN
	3_Member	GO Biological Processes	GO:0060401	cytosolic calcium ion transport	-2.09535	0	10/173	930,1490,4308,5027,6373,7226,9001,10345,57190,162514	CD19,CCN2,TRPM1,P2RX7,CXCL11,TRPM2,HAP1,TRDN,SELENON,TRPV3
4_Summary		GO Biological Processes	GO:0002218	activation of innate immune response	-4.30201	-1.31117	13/148	3822,4584,4586,5719,10071,81030,94025,115004,140453,200958,283463,340061,727897,101,1535,3123,3105,3106,4795,23208,26007,200316,733,930,1379,1493,1793,2357,3115,3426,5079,7917,25865,28,1650,11253,29929,83548,168391,3074,3425,5046,5806,9951	KLRC2,MUC3A,MUC5AC,PSMD13,MUC12,ZBP1,MUC16,CGAS,MUC17,MUC20,MUC19,STING1,MUC5B,ADAM8,CYBA,HLA-DRB1,HLA-A,HLA-B,NFKBIL1,SYT11,TKFC,APOBEC3F,C8G,CD19,CR1L,CTLA4,DOCK1,FPR1,HLA-DPB1,CFI,PAX5,BAG6,PRKD2,ABO,DDOST,MAN1B1,ALG6,COG3,GALNTL5,HEXB,IDUA,PCSK6,PTX3,HS3ST4
	4_Member	GO Biological Processes	GO:0002218	activation of innate immune response	-4.30201	-1.31117	13/148	3822,4584,4586,5719,10071,81030,94025,115004,140453,200958,283463,340061,727897	KLRC2,MUC3A,MUC5AC,PSMD13,MUC12,ZBP1,MUC16,CGAS,MUC17,MUC20,MUC19,STING1,MUC5B
	4_Member	GO Biological Processes	GO:0016266	O-glycan processing	-4.05651	-1.092	8/61	4584,4586,10071,94025,140453,200958,283463,727897	MUC3A,MUC5AC,MUC12,MUC16,MUC17,MUC20,MUC19,MUC5B
	4_Member	GO Biological Processes	GO:0002223	stimulatory C-type lectin receptor signaling pathway	-3.43686	-0.637044	10/114	3822,4584,4586,5719,10071,94025,140453,200958,283463,727897	KLRC2,MUC3A,MUC5AC,PSMD13,MUC12,MUC16,MUC17,MUC20,MUC19,MUC5B
	4_Member	GO Biological Processes	GO:0002833	positive regulation of response to biotic stimulus	-3.35752	-0.603191	16/258	101,1535,3123,3822,4584,4586,5719,10071,81030,94025,115004,140453,200958,283463,340061,727897	ADAM8,CYBA,HLA-DRB1,KLRC2,MUC3A,MUC5AC,PSMD13,MUC12,ZBP1,MUC16,CGAS,MUC17,MUC20,MUC19,STING1,MUC5B
	4_Member	GO Biological Processes	GO:0002831	regulation of response to biotic stimulus	-3.35099	-0.603191	22/420	101,1535,3105,3106,3123,3822,4584,4586,4795,5719,10071,23208,26007,81030,94025,115004,140453,200316,200958,283463,340061,727897	ADAM8,CYBA,HLA-A,HLA-B,HLA-DRB1,KLRC2,MUC3A,MUC5AC,NFKBIL1,PSMD13,MUC12,SYT11,TKFC,ZBP1,MUC16,CGAS,MUC17,APOBEC3F,MUC20,MUC19,STING1,MUC5B
	4_Member	GO Biological Processes	GO:0002220	innate immune response activating cell surface receptor signaling pathway	-3.3172	-0.584639	10/118	3822,4584,4586,5719,10071,94025,140453,200958,283463,727897	KLRC2,MUC3A,MUC5AC,PSMD13,MUC12,MUC16,MUC17,MUC20,MUC19,MUC5B
	4_Member	GO Biological Processes	GO:0002758	innate immune response-activating signal transduction	-3.28814	-0.574621	10/119	3822,4584,4586,5719,10071,94025,140453,200958,283463,727897	KLRC2,MUC3A,MUC5AC,PSMD13,MUC12,MUC16,MUC17,MUC20,MUC19,MUC5B
	4_Member	GO Biological Processes	GO:0045089	positive regulation of innate immune response	-3.06085	-0.529876	14/223	101,3822,4584,4586,5719,10071,81030,94025,115004,140453,200958,283463,340061,727897	ADAM8,KLRC2,MUC3A,MUC5AC,PSMD13,MUC12,ZBP1,MUC16,CGAS,MUC17,MUC20,MUC19,STING1,MUC5B
	4_Member	GO Biological Processes	GO:0002253	activation of immune response	-2.91874	-0.448062	26/573	733,930,1379,1493,1793,2357,3105,3115,3123,3426,3822,4584,4586,5079,5719,7917,10071,25865,81030,94025,115004,140453,200958,283463,340061,727897	C8G,CD19,CR1L,CTLA4,DOCK1,FPR1,HLA-A,HLA-DPB1,HLA-DRB1,CFI,KLRC2,MUC3A,MUC5AC,PAX5,PSMD13,BAG6,MUC12,PRKD2,ZBP1,MUC16,CGAS,MUC17,MUC20,MUC19,STING1,MUC5B
	4_Member	GO Biological Processes	GO:0045088	regulation of innate immune response	-2.85716	-0.410389	17/315	101,3105,3106,3822,4584,4586,5719,10071,26007,81030,94025,115004,140453,200958,283463,340061,727897	ADAM8,HLA-A,HLA-B,KLRC2,MUC3A,MUC5AC,PSMD13,MUC12,TKFC,ZBP1,MUC16,CGAS,MUC17,MUC20,MUC19,STING1,MUC5B
	4_Member	GO Biological Processes	GO:0006486	protein glycosylation	-2.54812	-0.221879	14/253	28,1650,4584,4586,10071,11253,29929,83548,94025,140453,168391,200958,283463,727897	ABO,DDOST,MUC3A,MUC5AC,MUC12,MAN1B1,ALG6,COG3,MUC16,MUC17,GALNTL5,MUC20,MUC19,MUC5B
	4_Member	GO Biological Processes	GO:0043413	macromolecule glycosylation	-2.54812	-0.221879	14/253	28,1650,4584,4586,10071,11253,29929,83548,94025,140453,168391,200958,283463,727897	ABO,DDOST,MUC3A,MUC5AC,MUC12,MAN1B1,ALG6,COG3,MUC16,MUC17,GALNTL5,MUC20,MUC19,MUC5B
	4_Member	GO Biological Processes	GO:0006493	protein O-linked glycosylation	-2.42062	-0.139481	8/107	4584,4586,10071,94025,140453,200958,283463,727897	MUC3A,MUC5AC,MUC12,MUC16,MUC17,MUC20,MUC19,MUC5B
	4_Member	GO Biological Processes	GO:0070085	glycosylation	-2.35499	-0.0980651	14/266	28,1650,4584,4586,10071,11253,29929,83548,94025,140453,168391,200958,283463,727897	ABO,DDOST,MUC3A,MUC5AC,MUC12,MAN1B1,ALG6,COG3,MUC16,MUC17,GALNTL5,MUC20,MUC19,MUC5B
	4_Member	GO Biological Processes	GO:0009100	glycoprotein metabolic process	-2.22682	-0.0141318	19/424	28,1650,3074,3425,4584,4586,5046,5806,9951,10071,11253,29929,83548,94025,140453,168391,200958,283463,727897	ABO,DDOST,HEXB,IDUA,MUC3A,MUC5AC,PCSK6,PTX3,HS3ST4,MUC12,MAN1B1,ALG6,COG3,MUC16,MUC17,GALNTL5,MUC20,MUC19,MUC5B
5_Summary		GO Biological Processes	GO:0050982	detection of mechanical stimulus	-3.85382	-0.93762	7/49	7273,25861,83862,84059,114780,168507,342372,7287,80036	TTN,WHRN,TMEM120A,ADGRV1,PKD1L2,PKD1L1,PKD1L3,TULP1,TRPM3
	5_Member	GO Biological Processes	GO:0050982	detection of mechanical stimulus	-3.85382	-0.93762	7/49	7273,25861,83862,84059,114780,168507,342372	TTN,WHRN,TMEM120A,ADGRV1,PKD1L2,PKD1L1,PKD1L3
	5_Member	GO Biological Processes	GO:0009581	detection of external stimulus	-2.18473	0	9/142	7273,7287,25861,80036,83862,84059,114780,168507,342372	TTN,TULP1,WHRN,TRPM3,TMEM120A,ADGRV1,PKD1L2,PKD1L1,PKD1L3
	5_Member	GO Biological Processes	GO:0009582	detection of abiotic stimulus	-2.12724	0	9/145	7273,7287,25861,80036,83862,84059,114780,168507,342372	TTN,TULP1,WHRN,TRPM3,TMEM120A,ADGRV1,PKD1L2,PKD1L1,PKD1L3
6_Summary		GO Biological Processes	GO:0050909	sensory perception of taste	-3.63092	-0.777125	8/70	6339,83756,119395,255022,259289,259295,342372,353164	SCNN1D,TAS1R3,CALHM3,CALHM1,TAS2R43,TAS2R20,PKD1L3,TAS2R42
	6_Member	GO Biological Processes	GO:0050909	sensory perception of taste	-3.63092	-0.777125	8/70	6339,83756,119395,255022,259289,259295,342372,353164	SCNN1D,TAS1R3,CALHM3,CALHM1,TAS2R43,TAS2R20,PKD1L3,TAS2R42
	6_Member	GO Biological Processes	GO:0050912	detection of chemical stimulus involved in sensory perception of taste	-2.3186	-0.077881	5/47	83756,259289,259295,342372,353164	TAS1R3,TAS2R43,TAS2R20,PKD1L3,TAS2R42
7_Summary		GO Biological Processes	GO:0034446	substrate adhesion-dependent cell spreading	-3.62734	-0.777125	10/108	1793,2335,3911,5829,6239,11078,23380,55698,57580,84628,1277,1490,2196,2199,3204,11117,22801,50488	DOCK1,FN1,LAMA5,PXN,RREB1,TRIOBP,SRGAP2,RADIL,PREX1,NTNG2,COL1A1,CCN2,FAT2,FBLN2,HOXA7,EMILIN1,ITGA11,MINK1
	7_Member	GO Biological Processes	GO:0034446	substrate adhesion-dependent cell spreading	-3.62734	-0.777125	10/108	1793,2335,3911,5829,6239,11078,23380,55698,57580,84628	DOCK1,FN1,LAMA5,PXN,RREB1,TRIOBP,SRGAP2,RADIL,PREX1,NTNG2
	7_Member	GO Biological Processes	GO:0031589	cell-substrate adhesion	-2.62658	-0.270474	18/360	1277,1490,1793,2196,2199,2335,3204,3911,5829,6239,11078,11117,22801,23380,50488,55698,57580,84628	COL1A1,CCN2,DOCK1,FAT2,FBLN2,FN1,HOXA7,LAMA5,PXN,RREB1,TRIOBP,EMILIN1,ITGA11,SRGAP2,MINK1,RADIL,PREX1,NTNG2
8_Summary		GO Biological Processes	GO:0009595	detection of biotic stimulus	-3.62	-0.777125	6/38	706,3105,3106,3123,7096,54825,3107,2634,3115,4261,1535,5719,9554	TSPO,HLA-A,HLA-B,HLA-DRB1,TLR1,CDHR2,HLA-C,GBP2,HLA-DPB1,CIITA,CYBA,PSMD13,SEC22B
	8_Member	GO Biological Processes	GO:0009595	detection of biotic stimulus	-3.62	-0.777125	6/38	706,3105,3106,3123,7096,54825	TSPO,HLA-A,HLA-B,HLA-DRB1,TLR1,CDHR2
	8_Member	GO Biological Processes	GO:0016045	detection of bacterium	-3.24854	-0.574621	4/17	3105,3106,3123,7096	HLA-A,HLA-B,HLA-DRB1,TLR1
	8_Member	GO Biological Processes	GO:0002484	antigen processing and presentation of endogenous peptide antigen via MHC class I via ER pathway	-3.17851	-0.574621	3/8	3105,3106,3107	HLA-A,HLA-B,HLA-C
	8_Member	GO Biological Processes	GO:0002486	antigen processing and presentation of endogenous peptide antigen via MHC class I via ER pathway, TAP-independent	-3.17851	-0.574621	3/8	3105,3106,3107	HLA-A,HLA-B,HLA-C
	8_Member	GO Biological Processes	GO:0002483	antigen processing and presentation of endogenous peptide antigen	-3.05295	-0.529876	4/19	3105,3106,3107,3123	HLA-A,HLA-B,HLA-C,HLA-DRB1
	8_Member	GO Biological Processes	GO:0098543	detection of other organism	-3.05295	-0.529876	4/19	3105,3106,3123,7096	HLA-A,HLA-B,HLA-DRB1,TLR1
	8_Member	GO Biological Processes	GO:0002480	antigen processing and presentation of exogenous peptide antigen via MHC class I, TAP-independent	-3.01007	-0.505306	3/9	3105,3106,3107	HLA-A,HLA-B,HLA-C
	8_Member	GO Biological Processes	GO:0098581	detection of external biotic stimulus	-2.65539	-0.290192	4/24	3105,3106,3123,7096	HLA-A,HLA-B,HLA-DRB1,TLR1
	8_Member	GO Biological Processes	GO:0019883	antigen processing and presentation of endogenous antigen	-2.52323	-0.203338	4/26	3105,3106,3107,3123	HLA-A,HLA-B,HLA-C,HLA-DRB1
	8_Member	GO Biological Processes	GO:0060333	interferon-gamma-mediated signaling pathway	-2.24672	-0.0221801	7/91	2634,3105,3106,3107,3115,3123,4261	GBP2,HLA-A,HLA-B,HLA-C,HLA-DPB1,HLA-DRB1,CIITA
	8_Member	GO Biological Processes	GO:0019885	antigen processing and presentation of endogenous peptide antigen via MHC class I	-2.16266	0	3/17	3105,3106,3107	HLA-A,HLA-B,HLA-C
	8_Member	GO Biological Processes	GO:0002479	antigen processing and presentation of exogenous peptide antigen via MHC class I, TAP-dependent	-2.074	0	6/75	1535,3105,3106,3107,5719,9554	CYBA,HLA-A,HLA-B,HLA-C,PSMD13,SEC22B
9_Summary		GO Biological Processes	GO:1901374	acetate ester transport	-3.61036	-0.777125	3/6	6572,6865,80736	SLC18A3,TACR2,SLC44A4
	9_Member	GO Biological Processes	GO:1901374	acetate ester transport	-3.61036	-0.777125	3/6	6572,6865,80736	SLC18A3,TACR2,SLC44A4
10_Summary		GO Biological Processes	GO:0060119	inner ear receptor cell development	-3.43406	-0.637044	6/41	4669,11078,25861,25987,64072,84059,80736,1277,3074,7466,26018,55084,83862,339768,7287,9696,286204,653781,2737,6939	NAGLU,TRIOBP,WHRN,TSKU,CDH23,ADGRV1,SLC44A4,COL1A1,HEXB,WFS1,LRIG1,SOBP,TMEM120A,ESPNL,TULP1,CROCC,CRB2,POTEJ,GLI3,TCF15
	10_Member	GO Biological Processes	GO:0060119	inner ear receptor cell development	-3.43406	-0.637044	6/41	4669,11078,25861,25987,64072,84059	NAGLU,TRIOBP,WHRN,TSKU,CDH23,ADGRV1
	10_Member	GO Biological Processes	GO:0042490	mechanoreceptor differentiation	-3.21029	-0.574621	7/62	4669,11078,25861,25987,64072,80736,84059	NAGLU,TRIOBP,WHRN,TSKU,CDH23,SLC44A4,ADGRV1
	10_Member	GO Biological Processes	GO:0060122	inner ear receptor cell stereocilium organization	-3.1404	-0.558223	5/31	11078,25861,25987,64072,84059	TRIOBP,WHRN,TSKU,CDH23,ADGRV1
	10_Member	GO Biological Processes	GO:0050954	sensory perception of mechanical stimulus	-2.68477	-0.290192	11/167	1277,3074,7466,11078,25861,26018,55084,64072,83862,84059,339768	COL1A1,HEXB,WFS1,TRIOBP,WHRN,LRIG1,SOBP,CDH23,TMEM120A,ADGRV1,ESPNL
	10_Member	GO Biological Processes	GO:0060113	inner ear receptor cell differentiation	-2.66474	-0.290192	6/57	4669,11078,25861,25987,64072,84059	NAGLU,TRIOBP,WHRN,TSKU,CDH23,ADGRV1
	10_Member	GO Biological Processes	GO:0007605	sensory perception of sound	-2.59034	-0.240477	10/147	1277,3074,7466,11078,25861,26018,55084,64072,84059,339768	COL1A1,HEXB,WFS1,TRIOBP,WHRN,LRIG1,SOBP,CDH23,ADGRV1,ESPNL
	10_Member	GO Biological Processes	GO:0001895	retina homeostasis	-2.55737	-0.221879	7/80	7287,9696,25861,64072,84059,286204,653781	TULP1,CROCC,WHRN,CDH23,ADGRV1,CRB2,POTEJ
	10_Member	GO Biological Processes	GO:0045494	photoreceptor cell maintenance	-2.44359	-0.151723	5/44	7287,9696,64072,84059,286204	TULP1,CROCC,CDH23,ADGRV1,CRB2
	10_Member	GO Biological Processes	GO:0043583	ear development	-2.06619	0	11/202	2737,4669,6939,11078,25861,25987,26018,55084,64072,80736,84059	GLI3,NAGLU,TCF15,TRIOBP,WHRN,TSKU,LRIG1,SOBP,CDH23,SLC44A4,ADGRV1
	10_Member	GO Biological Processes	GO:0048839	inner ear development	-2.04548	0	10/176	2737,4669,11078,25861,25987,26018,55084,64072,80736,84059	GLI3,NAGLU,TRIOBP,WHRN,TSKU,LRIG1,SOBP,CDH23,SLC44A4,ADGRV1
11_Summary		GO Biological Processes	GO:0090036	regulation of protein kinase C signaling	-3.35693	-0.603191	4/16	2324,4157,54986,84059,7273,8736,9049	FLT4,MC1R,ULK4,ADGRV1,TTN,MYOM1,AIP
	11_Member	GO Biological Processes	GO:0090036	regulation of protein kinase C signaling	-3.35693	-0.603191	4/16	2324,4157,54986,84059	FLT4,MC1R,ULK4,ADGRV1
	11_Member	GO Biological Processes	GO:0090037	positive regulation of protein kinase C signaling	-3.01007	-0.505306	3/9	2324,4157,84059	FLT4,MC1R,ADGRV1
	11_Member	GO Biological Processes	GO:0010737	protein kinase A signaling	-2.78156	-0.350033	5/37	4157,7273,8736,9049,84059	MC1R,TTN,MYOM1,AIP,ADGRV1
	11_Member	GO Biological Processes	GO:0070528	protein kinase C signaling	-2.24023	-0.0221801	4/31	2324,4157,54986,84059	FLT4,MC1R,ULK4,ADGRV1
12_Summary		GO Biological Processes	GO:0045229	external encapsulating structure organization	-3.26599	-0.574621	21/398	101,183,824,1277,1278,1490,2199,2335,3036,3339,3911,5806,6939,7053,7177,11117,11173,22801,81794,84628,118856	ADAM8,AGT,CAPN2,COL1A1,COL1A2,CCN2,FBLN2,FN1,HAS1,HSPG2,LAMA5,PTX3,TCF15,TGM3,TPSAB1,EMILIN1,ADAMTS7,ITGA11,ADAMTS10,NTNG2,MMP21
	12_Member	GO Biological Processes	GO:0045229	external encapsulating structure organization	-3.26599	-0.574621	21/398	101,183,824,1277,1278,1490,2199,2335,3036,3339,3911,5806,6939,7053,7177,11117,11173,22801,81794,84628,118856	ADAM8,AGT,CAPN2,COL1A1,COL1A2,CCN2,FBLN2,FN1,HAS1,HSPG2,LAMA5,PTX3,TCF15,TGM3,TPSAB1,EMILIN1,ADAMTS7,ITGA11,ADAMTS10,NTNG2,MMP21
	12_Member	GO Biological Processes	GO:0030198	extracellular matrix organization	-2.92076	-0.448062	20/395	101,183,824,1277,1278,1490,2199,2335,3036,3339,3911,5806,6939,7177,11117,11173,22801,81794,84628,118856	ADAM8,AGT,CAPN2,COL1A1,COL1A2,CCN2,FBLN2,FN1,HAS1,HSPG2,LAMA5,PTX3,TCF15,TPSAB1,EMILIN1,ADAMTS7,ITGA11,ADAMTS10,NTNG2,MMP21
	12_Member	GO Biological Processes	GO:0043062	extracellular structure organization	-2.90764	-0.445074	20/396	101,183,824,1277,1278,1490,2199,2335,3036,3339,3911,5806,6939,7177,11117,11173,22801,81794,84628,118856	ADAM8,AGT,CAPN2,COL1A1,COL1A2,CCN2,FBLN2,FN1,HAS1,HSPG2,LAMA5,PTX3,TCF15,TPSAB1,EMILIN1,ADAMTS7,ITGA11,ADAMTS10,NTNG2,MMP21
	12_Member	GO Biological Processes	GO:0085029	extracellular matrix assembly	-2.40077	-0.135232	5/45	183,1278,3036,11117,84628	AGT,COL1A2,HAS1,EMILIN1,NTNG2
13_Summary		GO Biological Processes	GO:0033601	positive regulation of mammary gland epithelial cell proliferation	-3.17851	-0.574621	3/8	4485,6239,11223,4486,200958,140710,150094	MST1,RREB1,MST1L,MST1R,MUC20,SOGA1,SIK1
	13_Member	GO Biological Processes	GO:0033601	positive regulation of mammary gland epithelial cell proliferation	-3.17851	-0.574621	3/8	4485,6239,11223	MST1,RREB1,MST1L
	13_Member	GO Biological Processes	GO:0048012	hepatocyte growth factor receptor signaling pathway	-2.23941	-0.0221801	3/16	4485,4486,200958	MST1,MST1R,MUC20
	13_Member	GO Biological Processes	GO:0033599	regulation of mammary gland epithelial cell proliferation	-2.16266	0	3/17	4485,6239,11223	MST1,RREB1,MST1L
	13_Member	GO Biological Processes	GO:0045721	negative regulation of gluconeogenesis	-2.09104	0	3/18	4485,140710,150094	MST1,SOGA1,SIK1
14_Summary		GO Biological Processes	GO:0009698	phenylpropanoid metabolic process	-3.17851	-0.574621	3/8	1548,1549,1565,26,4835,9049,29104,91703,442038	CYP2A6,CYP2A7,CYP2D6,AOC1,NQO2,AIP,N6AMT1,ACY3,SULT1C3
	14_Member	GO Biological Processes	GO:0009698	phenylpropanoid metabolic process	-3.17851	-0.574621	3/8	1548,1549,1565	CYP2A6,CYP2A7,CYP2D6
	14_Member	GO Biological Processes	GO:0009804	coumarin metabolic process	-3.17851	-0.574621	3/8	1548,1549,1565	CYP2A6,CYP2A7,CYP2D6
	14_Member	GO Biological Processes	GO:0006805	xenobiotic metabolic process	-2.66802	-0.290192	9/120	26,1548,1549,1565,4835,9049,29104,91703,442038	AOC1,CYP2A6,CYP2A7,CYP2D6,NQO2,AIP,N6AMT1,ACY3,SULT1C3
	14_Member	GO Biological Processes	GO:0071466	cellular response to xenobiotic stimulus	-2.54761	-0.221879	9/125	26,1548,1549,1565,4835,9049,29104,91703,442038	AOC1,CYP2A6,CYP2A7,CYP2D6,NQO2,AIP,N6AMT1,ACY3,SULT1C3
	14_Member	GO Biological Processes	GO:0009410	response to xenobiotic stimulus	-2.4118	-0.138784	9/131	26,1548,1549,1565,4835,9049,29104,91703,442038	AOC1,CYP2A6,CYP2A7,CYP2D6,NQO2,AIP,N6AMT1,ACY3,SULT1C3
15_Summary		GO Biological Processes	GO:0007156	homophilic cell adhesion via plasma membrane adhesion molecules	-3.16278	-0.569885	12/169	1013,1823,2195,2196,9620,26167,53841,54825,56128,64072,83872,120114,5802,84628,91179,286204	CDH15,DSC1,FAT1,FAT2,CELSR1,PCDHB5,CDHR5,CDHR2,PCDHB8,CDH23,HMCN1,FAT3,PTPRS,NTNG2,SCARF2,CRB2
	15_Member	GO Biological Processes	GO:0007156	homophilic cell adhesion via plasma membrane adhesion molecules	-3.16278	-0.569885	12/169	1013,1823,2195,2196,9620,26167,53841,54825,56128,64072,83872,120114	CDH15,DSC1,FAT1,FAT2,CELSR1,PCDHB5,CDHR5,CDHR2,PCDHB8,CDH23,HMCN1,FAT3
	15_Member	GO Biological Processes	GO:0098742	cell-cell adhesion via plasma-membrane adhesion molecules	-3.0594	-0.529876	16/275	1013,1823,2195,2196,5802,9620,26167,53841,54825,56128,64072,83872,84628,91179,120114,286204	CDH15,DSC1,FAT1,FAT2,PTPRS,CELSR1,PCDHB5,CDHR5,CDHR2,PCDHB8,CDH23,HMCN1,NTNG2,SCARF2,FAT3,CRB2
16_Summary		GO Biological Processes	GO:0042119	neutrophil activation	-3.05274	-0.529876	24/501	1,26,101,1535,1650,1823,2357,3074,3106,3107,5719,5799,5806,7226,10288,10394,10487,10788,23526,57580,83858,84658,160364,340061,7096,8877,23208,26762,146722,2335,3822,6854,7273,8911,8912,8938,255057	A1BG,AOC1,ADAM8,CYBA,DDOST,DSC1,FPR1,HEXB,HLA-B,HLA-C,PSMD13,PTPRN2,PTX3,TRPM2,LILRB2,PRG3,CAP1,IQGAP2,ARHGAP45,PREX1,ATAD3B,ADGRE3,CLEC12A,STING1,TLR1,SPHK1,SYT11,HAVCR1,CD300LF,FN1,KLRC2,SYN2,TTN,CACNA1I,CACNA1H,BAIAP3,CBARP
	16_Member	GO Biological Processes	GO:0042119	neutrophil activation	-3.05274	-0.529876	24/501	1,26,101,1535,1650,1823,2357,3074,3106,3107,5719,5799,5806,7226,10288,10394,10487,10788,23526,57580,83858,84658,160364,340061	A1BG,AOC1,ADAM8,CYBA,DDOST,DSC1,FPR1,HEXB,HLA-B,HLA-C,PSMD13,PTPRN2,PTX3,TRPM2,LILRB2,PRG3,CAP1,IQGAP2,ARHGAP45,PREX1,ATAD3B,ADGRE3,CLEC12A,STING1
	16_Member	GO Biological Processes	GO:0036230	granulocyte activation	-2.99402	-0.49803	24/506	1,26,101,1535,1650,1823,2357,3074,3106,3107,5719,5799,5806,7226,10288,10394,10487,10788,23526,57580,83858,84658,160364,340061	A1BG,AOC1,ADAM8,CYBA,DDOST,DSC1,FPR1,HEXB,HLA-B,HLA-C,PSMD13,PTPRN2,PTX3,TRPM2,LILRB2,PRG3,CAP1,IQGAP2,ARHGAP45,PREX1,ATAD3B,ADGRE3,CLEC12A,STING1
	16_Member	GO Biological Processes	GO:0002274	myeloid leukocyte activation	-2.96365	-0.47626	29/661	1,26,101,1535,1650,1823,2357,3074,3106,3107,5719,5799,5806,7096,7226,8877,10288,10394,10487,10788,23208,23526,26762,57580,83858,84658,146722,160364,340061	A1BG,AOC1,ADAM8,CYBA,DDOST,DSC1,FPR1,HEXB,HLA-B,HLA-C,PSMD13,PTPRN2,PTX3,TLR1,TRPM2,SPHK1,LILRB2,PRG3,CAP1,IQGAP2,SYT11,ARHGAP45,HAVCR1,PREX1,ATAD3B,ADGRE3,CD300LF,CLEC12A,STING1
	16_Member	GO Biological Processes	GO:0043312	neutrophil degranulation	-2.88056	-0.42596	23/486	1,26,101,1535,1650,1823,2357,3074,3106,3107,5719,5799,5806,7226,10288,10394,10487,10788,23526,83858,84658,160364,340061	A1BG,AOC1,ADAM8,CYBA,DDOST,DSC1,FPR1,HEXB,HLA-B,HLA-C,PSMD13,PTPRN2,PTX3,TRPM2,LILRB2,PRG3,CAP1,IQGAP2,ARHGAP45,ATAD3B,ADGRE3,CLEC12A,STING1
	16_Member	GO Biological Processes	GO:0002283	neutrophil activation involved in immune response	-2.84593	-0.406846	23/489	1,26,101,1535,1650,1823,2357,3074,3106,3107,5719,5799,5806,7226,10288,10394,10487,10788,23526,83858,84658,160364,340061	A1BG,AOC1,ADAM8,CYBA,DDOST,DSC1,FPR1,HEXB,HLA-B,HLA-C,PSMD13,PTPRN2,PTX3,TRPM2,LILRB2,PRG3,CAP1,IQGAP2,ARHGAP45,ATAD3B,ADGRE3,CLEC12A,STING1
	16_Member	GO Biological Processes	GO:0045055	regulated exocytosis	-2.74041	-0.316304	32/780	1,26,101,1535,1650,1823,2335,2357,3074,3106,3107,3822,5719,5799,5806,6854,7226,7273,8911,8912,8938,10288,10394,10487,10788,23208,23526,83858,84658,160364,255057,340061	A1BG,AOC1,ADAM8,CYBA,DDOST,DSC1,FN1,FPR1,HEXB,HLA-B,HLA-C,KLRC2,PSMD13,PTPRN2,PTX3,SYN2,TRPM2,TTN,CACNA1I,CACNA1H,BAIAP3,LILRB2,PRG3,CAP1,IQGAP2,SYT11,ARHGAP45,ATAD3B,ADGRE3,CLEC12A,CBARP,STING1
	16_Member	GO Biological Processes	GO:0002446	neutrophil mediated immunity	-2.72225	-0.305442	23/500	1,26,101,1535,1650,1823,2357,3074,3106,3107,5719,5799,5806,7226,10288,10394,10487,10788,23526,83858,84658,160364,340061	A1BG,AOC1,ADAM8,CYBA,DDOST,DSC1,FPR1,HEXB,HLA-B,HLA-C,PSMD13,PTPRN2,PTX3,TRPM2,LILRB2,PRG3,CAP1,IQGAP2,ARHGAP45,ATAD3B,ADGRE3,CLEC12A,STING1
	16_Member	GO Biological Processes	GO:0043299	leukocyte degranulation	-2.65264	-0.290192	24/537	1,26,101,1535,1650,1823,2357,3074,3106,3107,3822,5719,5799,5806,7226,10288,10394,10487,10788,23526,83858,84658,160364,340061	A1BG,AOC1,ADAM8,CYBA,DDOST,DSC1,FPR1,HEXB,HLA-B,HLA-C,KLRC2,PSMD13,PTPRN2,PTX3,TRPM2,LILRB2,PRG3,CAP1,IQGAP2,ARHGAP45,ATAD3B,ADGRE3,CLEC12A,STING1
	16_Member	GO Biological Processes	GO:0002275	myeloid cell activation involved in immune response	-2.2196	-0.0114169	23/550	1,26,101,1535,1650,1823,2357,3074,3106,3107,5719,5799,5806,7226,10288,10394,10487,10788,23526,83858,84658,160364,340061	A1BG,AOC1,ADAM8,CYBA,DDOST,DSC1,FPR1,HEXB,HLA-B,HLA-C,PSMD13,PTPRN2,PTX3,TRPM2,LILRB2,PRG3,CAP1,IQGAP2,ARHGAP45,ATAD3B,ADGRE3,CLEC12A,STING1
	16_Member	GO Biological Processes	GO:0002444	myeloid leukocyte mediated immunity	-2.19229	0	23/553	1,26,101,1535,1650,1823,2357,3074,3106,3107,5719,5799,5806,7226,10288,10394,10487,10788,23526,83858,84658,160364,340061	A1BG,AOC1,ADAM8,CYBA,DDOST,DSC1,FPR1,HEXB,HLA-B,HLA-C,PSMD13,PTPRN2,PTX3,TRPM2,LILRB2,PRG3,CAP1,IQGAP2,ARHGAP45,ATAD3B,ADGRE3,CLEC12A,STING1
17_Summary		GO Biological Processes	GO:2001222	regulation of neuron migration	-2.67744	-0.290192	5/39	23380,54986,83482,84628,653464,706,2737,3074	SRGAP2,ULK4,SCRT1,NTNG2,SRGAP2C,TSPO,GLI3,HEXB
	17_Member	GO Biological Processes	GO:2001222	regulation of neuron migration	-2.67744	-0.290192	5/39	23380,54986,83482,84628,653464	SRGAP2,ULK4,SCRT1,NTNG2,SRGAP2C
	17_Member	GO Biological Processes	GO:0008347	glial cell migration	-2.20325	0	5/50	706,2737,3074,23380,653464	TSPO,GLI3,HEXB,SRGAP2,SRGAP2C
18_Summary		GO Biological Processes	GO:0051291	protein heterooligomerization	-2.65539	-0.290192	4/24	1278,83862,119395,255022,63910	COL1A2,TMEM120A,CALHM3,CALHM1,SLC17A9
	18_Member	GO Biological Processes	GO:0051291	protein heterooligomerization	-2.65539	-0.290192	4/24	1278,83862,119395,255022	COL1A2,TMEM120A,CALHM3,CALHM1
	18_Member	GO Biological Processes	GO:0015867	ATP transport	-2.16266	0	3/17	63910,119395,255022	SLC17A9,CALHM3,CALHM1
19_Summary		GO Biological Processes	GO:0006929	substrate-dependent cell migration	-2.65539	-0.290192	4/24	101,2335,22801,23294	ADAM8,FN1,ITGA11,ANKS1A
	19_Member	GO Biological Processes	GO:0006929	substrate-dependent cell migration	-2.65539	-0.290192	4/24	101,2335,22801,23294	ADAM8,FN1,ITGA11,ANKS1A
20_Summary		GO Biological Processes	GO:0032233	positive regulation of actin filament bundle assembly	-2.47859	-0.167971	6/62	1490,5829,10411,22899,55160,171024,752,1627,2195,4703,7226,7273,8476,9620,10487,10788,11078,11132,22836,23370,50488,51332,57580,84033,163782,339768,390594,440073,1277,1278,3861,10345,11117,83473,283234,401720,4650,23380	CCN2,PXN,RAPGEF3,ARHGEF15,ARHGEF10L,SYNPO2,FMNL1,DBN1,FAT1,NEB,TRPM2,TTN,CDC42BPA,CELSR1,CAP1,IQGAP2,TRIOBP,CAPN10,RHOBTB3,ARHGEF18,MINK1,SPTBN5,PREX1,OBSCN,KANK4,ESPNL,KBTBD13,IQSEC3,COL1A1,COL1A2,KRT14,TRDN,EMILIN1,KATNAL2,CCDC88B,FIGNL2,MYO9B,SRGAP2
	20_Member	GO Biological Processes	GO:0032233	positive regulation of actin filament bundle assembly	-2.47859	-0.167971	6/62	1490,5829,10411,22899,55160,171024	CCN2,PXN,RAPGEF3,ARHGEF15,ARHGEF10L,SYNPO2
	20_Member	GO Biological Processes	GO:0030036	actin cytoskeleton organization	-2.35207	-0.0980651	28/696	752,1490,1627,2195,4703,5829,7226,7273,8476,9620,10411,10487,10788,11078,11132,22836,22899,23370,50488,51332,55160,57580,84033,163782,171024,339768,390594,440073	FMNL1,CCN2,DBN1,FAT1,NEB,PXN,TRPM2,TTN,CDC42BPA,CELSR1,RAPGEF3,CAP1,IQGAP2,TRIOBP,CAPN10,RHOBTB3,ARHGEF15,ARHGEF18,MINK1,SPTBN5,ARHGEF10L,PREX1,OBSCN,KANK4,SYNPO2,ESPNL,KBTBD13,IQSEC3
	20_Member	GO Biological Processes	GO:0032956	regulation of actin cytoskeleton organization	-2.34854	-0.0980651	17/353	1490,1627,4703,5829,7226,9620,10411,10788,11078,22836,22899,23370,51332,55160,57580,163782,171024	CCN2,DBN1,NEB,PXN,TRPM2,CELSR1,RAPGEF3,IQGAP2,TRIOBP,RHOBTB3,ARHGEF15,ARHGEF18,SPTBN5,ARHGEF10L,PREX1,KANK4,SYNPO2
	20_Member	GO Biological Processes	GO:0097435	supramolecular fiber organization	-2.18972	0	28/716	1277,1278,1490,1627,2195,3861,4703,5829,7273,10345,10411,10788,11078,11117,22836,22899,23370,51332,55160,57580,83473,84033,163782,171024,283234,339768,390594,401720	COL1A1,COL1A2,CCN2,DBN1,FAT1,KRT14,NEB,PXN,TTN,TRDN,RAPGEF3,IQGAP2,TRIOBP,EMILIN1,RHOBTB3,ARHGEF15,ARHGEF18,SPTBN5,ARHGEF10L,PREX1,KATNAL2,OBSCN,KANK4,SYNPO2,CCDC88B,ESPNL,KBTBD13,FIGNL2
	20_Member	GO Biological Processes	GO:0051496	positive regulation of stress fiber assembly	-2.13113	0	5/52	1490,5829,10411,22899,55160	CCN2,PXN,RAPGEF3,ARHGEF15,ARHGEF10L
	20_Member	GO Biological Processes	GO:0030029	actin filament-based process	-2.1046	0	30/794	752,1490,1627,2195,4650,4703,5829,7226,7273,8476,9620,10411,10487,10788,11078,11132,22836,22899,23370,23380,50488,51332,55160,57580,84033,163782,171024,339768,390594,440073	FMNL1,CCN2,DBN1,FAT1,MYO9B,NEB,PXN,TRPM2,TTN,CDC42BPA,CELSR1,RAPGEF3,CAP1,IQGAP2,TRIOBP,CAPN10,RHOBTB3,ARHGEF15,ARHGEF18,SRGAP2,MINK1,SPTBN5,ARHGEF10L,PREX1,OBSCN,KANK4,SYNPO2,ESPNL,KBTBD13,IQSEC3
	20_Member	GO Biological Processes	GO:0007015	actin filament organization	-2.09317	0	19/437	1490,1627,2195,4703,5829,7273,10411,10788,11078,22836,22899,23370,51332,55160,57580,163782,171024,339768,390594	CCN2,DBN1,FAT1,NEB,PXN,TTN,RAPGEF3,IQGAP2,TRIOBP,RHOBTB3,ARHGEF15,ARHGEF18,SPTBN5,ARHGEF10L,PREX1,KANK4,SYNPO2,ESPNL,KBTBD13

## Sheet: CC
Supplementary Table 5. Enrichment of GO terms and KEGG pathways of MRONJ-associated genes.
GroupID		Category	Term	Description	LogP	Log(q-value)	InTerm_InList	Genes	Symbols
1_Summary		GO Cellular Components	GO:0045095	keratin filament	-8.14773	-4.86647	15/96	3861,81871,83899,85280,85285,353323,353333,386675,386676,386682,386683,653240,728224,728318,100132386,3123,8687,10763,79707,143,1548,1627,4650,23098,25861,55698,57326,64446,83473,91752,130540,642273	KRT14,KRTAP4-6,KRTAP9-2,KRTAP9-4,KRTAP4-1,KRTAP12-2,KRTAP10-10,KRTAP10-7,KRTAP10-9,KRTAP10-3,KRTAP12-3,KRTAP4-11,KRTAP4-8,KRTAP9-1,KRTAP4-9,HLA-DRB1,KRT38,NES,NOL9,PARP4,CYP2A6,DBN1,MYO9B,SARM1,WHRN,RADIL,PBXIP1,DNAI2,KATNAL2,ZNF804A,FLACC1,FAM110C
	1_Member	GO Cellular Components	GO:0045095	keratin filament	-8.14773	-4.86647	15/96	3861,81871,83899,85280,85285,353323,353333,386675,386676,386682,386683,653240,728224,728318,100132386	KRT14,KRTAP4-6,KRTAP9-2,KRTAP9-4,KRTAP4-1,KRTAP12-2,KRTAP10-10,KRTAP10-7,KRTAP10-9,KRTAP10-3,KRTAP12-3,KRTAP4-11,KRTAP4-8,KRTAP9-1,KRTAP4-9
	1_Member	GO Cellular Components	GO:0005882	intermediate filament	-5.42572	-2.44549	18/215	3123,3861,8687,10763,81871,83899,85280,85285,353323,353333,386675,386676,386682,386683,653240,728224,728318,100132386	HLA-DRB1,KRT14,KRT38,NES,KRTAP4-6,KRTAP9-2,KRTAP9-4,KRTAP4-1,KRTAP12-2,KRTAP10-10,KRTAP10-7,KRTAP10-9,KRTAP10-3,KRTAP12-3,KRTAP4-11,KRTAP4-8,KRTAP9-1,KRTAP4-9
	1_Member	GO Cellular Components	GO:0045111	intermediate filament cytoskeleton	-4.93371	-2.12957	19/256	3123,3861,8687,10763,79707,81871,83899,85280,85285,353323,353333,386675,386676,386682,386683,653240,728224,728318,100132386	HLA-DRB1,KRT14,KRT38,NES,NOL9,KRTAP4-6,KRTAP9-2,KRTAP9-4,KRTAP4-1,KRTAP12-2,KRTAP10-10,KRTAP10-7,KRTAP10-9,KRTAP10-3,KRTAP12-3,KRTAP4-11,KRTAP4-8,KRTAP9-1,KRTAP4-9
	1_Member	GO Cellular Components	GO:0099513	polymeric cytoskeletal fiber	-2.74806	-0.767824	31/747	143,1548,1627,3123,3861,4650,8687,10763,23098,25861,55698,57326,64446,81871,83473,83899,85280,85285,91752,130540,353323,353333,386675,386676,386682,386683,642273,653240,728224,728318,100132386	PARP4,CYP2A6,DBN1,HLA-DRB1,KRT14,MYO9B,KRT38,NES,SARM1,WHRN,RADIL,PBXIP1,DNAI2,KRTAP4-6,KATNAL2,KRTAP9-2,KRTAP9-4,KRTAP4-1,ZNF804A,FLACC1,KRTAP12-2,KRTAP10-10,KRTAP10-7,KRTAP10-9,KRTAP10-3,KRTAP12-3,FAM110C,KRTAP4-11,KRTAP4-8,KRTAP9-1,KRTAP4-9
2_Summary		GO Cellular Components	GO:0005796	Golgi lumen	-4.54314	-1.9302	11/102	3339,4584,4586,5046,6382,10071,94025,140453,200958,283463,727897	HSPG2,MUC3A,MUC5AC,PCSK6,SDC1,MUC12,MUC16,MUC17,MUC20,MUC19,MUC5B
	2_Member	GO Cellular Components	GO:0005796	Golgi lumen	-4.54314	-1.9302	11/102	3339,4584,4586,5046,6382,10071,94025,140453,200958,283463,727897	HSPG2,MUC3A,MUC5AC,PCSK6,SDC1,MUC12,MUC16,MUC17,MUC20,MUC19,MUC5B
3_Summary		GO Cellular Components	GO:0031012	extracellular matrix	-4.44739	-1.9302	30/566	1,183,1277,1278,1490,2161,2199,2335,3339,3911,4485,4586,5046,5806,7177,8857,10394,11117,11173,23145,26018,81794,83872,84628,114990,118856,127435,140453,256158,727897	A1BG,AGT,COL1A1,COL1A2,CCN2,F12,FBLN2,FN1,HSPG2,LAMA5,MST1,MUC5AC,PCSK6,PTX3,TPSAB1,FCGBP,PRG3,EMILIN1,ADAMTS7,SSPOP,LRIG1,ADAMTS10,HMCN1,NTNG2,VASN,MMP21,PODN,MUC17,HMCN2,MUC5B
	3_Member	GO Cellular Components	GO:0031012	extracellular matrix	-4.44739	-1.9302	30/566	1,183,1277,1278,1490,2161,2199,2335,3339,3911,4485,4586,5046,5806,7177,8857,10394,11117,11173,23145,26018,81794,83872,84628,114990,118856,127435,140453,256158,727897	A1BG,AGT,COL1A1,COL1A2,CCN2,F12,FBLN2,FN1,HSPG2,LAMA5,MST1,MUC5AC,PCSK6,PTX3,TPSAB1,FCGBP,PRG3,EMILIN1,ADAMTS7,SSPOP,LRIG1,ADAMTS10,HMCN1,NTNG2,VASN,MMP21,PODN,MUC17,HMCN2,MUC5B
	3_Member	GO Cellular Components	GO:0030312	external encapsulating structure	-4.43331	-1.9302	30/567	1,183,1277,1278,1490,2161,2199,2335,3339,3911,4485,4586,5046,5806,7177,8857,10394,11117,11173,23145,26018,81794,83872,84628,114990,118856,127435,140453,256158,727897	A1BG,AGT,COL1A1,COL1A2,CCN2,F12,FBLN2,FN1,HSPG2,LAMA5,MST1,MUC5AC,PCSK6,PTX3,TPSAB1,FCGBP,PRG3,EMILIN1,ADAMTS7,SSPOP,LRIG1,ADAMTS10,HMCN1,NTNG2,VASN,MMP21,PODN,MUC17,HMCN2,MUC5B
	3_Member	GO Cellular Components	GO:0062023	collagen-containing extracellular matrix	-2.91892	-0.841779	21/424	1,183,1277,1278,1490,2161,2199,2335,3339,3911,4485,5046,7177,10394,11117,81794,83872,84628,127435,140453,256158	A1BG,AGT,COL1A1,COL1A2,CCN2,F12,FBLN2,FN1,HSPG2,LAMA5,MST1,PCSK6,TPSAB1,PRG3,EMILIN1,ADAMTS10,HMCN1,NTNG2,PODN,MUC17,HMCN2
4_Summary		GO Cellular Components	GO:0071556	integral component of lumenal side of endoplasmic reticulum membrane	-4.30635	-1.92818	6/29	3105,3106,3107,3115,3123,56928,101,752,1535,7096,9554,23208,23380,122618,1493,6572,8578,8877,4580,4985,5027,5799,5802,6238,7466,9200,23353,27235,163183,340061,790955,55686,6854,255057,1650,1823,2357,7226,10288,10788,63910,83858,84658,91147,160364	HLA-A,HLA-B,HLA-C,HLA-DPB1,HLA-DRB1,SPPL2B,ADAM8,FMNL1,CYBA,TLR1,SEC22B,SYT11,SRGAP2,PLD4,CTLA4,SLC18A3,SCARF1,SPHK1,MTX1,OPRD1,P2RX7,PTPRN2,PTPRS,RRBP1,WFS1,HACD1,SUN1,COQ2,SYNE4,STING1,UQCC3,MREG,SYN2,CBARP,DDOST,DSC1,FPR1,TRPM2,LILRB2,IQGAP2,SLC17A9,ATAD3B,ADGRE3,TMEM67,CLEC12A
	4_Member	GO Cellular Components	GO:0071556	integral component of lumenal side of endoplasmic reticulum membrane	-4.30635	-1.92818	6/29	3105,3106,3107,3115,3123,56928	HLA-A,HLA-B,HLA-C,HLA-DPB1,HLA-DRB1,SPPL2B
	4_Member	GO Cellular Components	GO:0098553	lumenal side of endoplasmic reticulum membrane	-4.30635	-1.92818	6/29	3105,3106,3107,3115,3123,56928	HLA-A,HLA-B,HLA-C,HLA-DPB1,HLA-DRB1,SPPL2B
	4_Member	GO Cellular Components	GO:0098576	lumenal side of membrane	-3.75417	-1.47291	6/36	3105,3106,3107,3115,3123,56928	HLA-A,HLA-B,HLA-C,HLA-DPB1,HLA-DRB1,SPPL2B
	4_Member	GO Cellular Components	GO:0042611	MHC protein complex	-3.51044	-1.27057	5/26	3105,3106,3107,3115,3123	HLA-A,HLA-B,HLA-C,HLA-DPB1,HLA-DRB1
	4_Member	GO Cellular Components	GO:0045335	phagocytic vesicle	-3.41784	-1.21576	11/136	101,752,1535,3105,3106,3107,7096,9554,23208,23380,122618	ADAM8,FMNL1,CYBA,HLA-A,HLA-B,HLA-C,TLR1,SEC22B,SYT11,SRGAP2,PLD4
	4_Member	GO Cellular Components	GO:0030139	endocytic vesicle	-2.97761	-0.872437	17/307	101,752,1493,1535,3105,3106,3107,3115,3123,6572,7096,8578,8877,9554,23208,23380,122618	ADAM8,FMNL1,CTLA4,CYBA,HLA-A,HLA-B,HLA-C,HLA-DPB1,HLA-DRB1,SLC18A3,TLR1,SCARF1,SPHK1,SEC22B,SYT11,SRGAP2,PLD4
	4_Member	GO Cellular Components	GO:0042612	MHC class I protein complex	-2.8628	-0.833789	3/10	3105,3106,3107	HLA-A,HLA-B,HLA-C
	4_Member	GO Cellular Components	GO:0031301	integral component of organelle membrane	-2.85978	-0.833789	19/371	3105,3106,3107,3115,3123,4580,4985,5027,5799,5802,6238,7466,9200,23353,27235,56928,163183,340061,790955	HLA-A,HLA-B,HLA-C,HLA-DPB1,HLA-DRB1,MTX1,OPRD1,P2RX7,PTPRN2,PTPRS,RRBP1,WFS1,HACD1,SUN1,COQ2,SPPL2B,SYNE4,STING1,UQCC3
	4_Member	GO Cellular Components	GO:0031300	intrinsic component of organelle membrane	-2.83008	-0.82757	20/402	3105,3106,3107,3115,3123,4580,4985,5027,5799,5802,6238,7466,9200,23353,27235,55686,56928,163183,340061,790955	HLA-A,HLA-B,HLA-C,HLA-DPB1,HLA-DRB1,MTX1,OPRD1,P2RX7,PTPRN2,PTPRS,RRBP1,WFS1,HACD1,SUN1,COQ2,MREG,SPPL2B,SYNE4,STING1,UQCC3
	4_Member	GO Cellular Components	GO:0012507	ER to Golgi transport vesicle membrane	-2.47859	-0.587196	6/62	3105,3106,3107,3115,3123,9554	HLA-A,HLA-B,HLA-C,HLA-DPB1,HLA-DRB1,SEC22B
	4_Member	GO Cellular Components	GO:0030658	transport vesicle membrane	-2.43709	-0.587196	12/206	3105,3106,3107,3115,3123,4985,5799,5802,6572,6854,9554,255057	HLA-A,HLA-B,HLA-C,HLA-DPB1,HLA-DRB1,OPRD1,PTPRN2,PTPRS,SLC18A3,SYN2,SEC22B,CBARP
	4_Member	GO Cellular Components	GO:0030176	integral component of endoplasmic reticulum membrane	-2.38553	-0.551425	10/157	3105,3106,3107,3115,3123,6238,7466,9200,56928,340061	HLA-A,HLA-B,HLA-C,HLA-DPB1,HLA-DRB1,RRBP1,WFS1,HACD1,SPPL2B,STING1
	4_Member	GO Cellular Components	GO:0030666	endocytic vesicle membrane	-2.27167	-0.481775	10/163	1535,3105,3106,3107,3115,3123,6572,7096,8578,9554	CYBA,HLA-A,HLA-B,HLA-C,HLA-DPB1,HLA-DRB1,SLC18A3,TLR1,SCARF1,SEC22B
	4_Member	GO Cellular Components	GO:0031227	intrinsic component of endoplasmic reticulum membrane	-2.23511	-0.460773	10/165	3105,3106,3107,3115,3123,6238,7466,9200,56928,340061	HLA-A,HLA-B,HLA-C,HLA-DPB1,HLA-DRB1,RRBP1,WFS1,HACD1,SPPL2B,STING1
	4_Member	GO Cellular Components	GO:0030659	cytoplasmic vesicle membrane	-2.22352	-0.460773	30/778	101,1535,1650,1823,2357,3105,3106,3107,3115,3123,4985,5799,5802,6572,6854,7096,7226,8578,9554,10288,10788,23208,55686,63910,83858,84658,91147,160364,255057,340061	ADAM8,CYBA,DDOST,DSC1,FPR1,HLA-A,HLA-B,HLA-C,HLA-DPB1,HLA-DRB1,OPRD1,PTPRN2,PTPRS,SLC18A3,SYN2,TLR1,TRPM2,SCARF1,SEC22B,LILRB2,IQGAP2,SYT11,MREG,SLC17A9,ATAD3B,ADGRE3,TMEM67,CLEC12A,CBARP,STING1
	4_Member	GO Cellular Components	GO:0030670	phagocytic vesicle membrane	-2.02002	-0.306958	6/77	1535,3105,3106,3107,7096,9554	CYBA,HLA-A,HLA-B,HLA-C,TLR1,SEC22B
5_Summary		GO Cellular Components	GO:0101003	ficolin-1-rich granule membrane	-4.05651	-1.72949	8/61	101,1823,2357,5799,7226,10288,83858,84658,1535,5806,10394,160364,1650,3106,3107,10788,63910,340061	ADAM8,DSC1,FPR1,PTPRN2,TRPM2,LILRB2,ATAD3B,ADGRE3,CYBA,PTX3,PRG3,CLEC12A,DDOST,HLA-B,HLA-C,IQGAP2,SLC17A9,STING1
	5_Member	GO Cellular Components	GO:0101003	ficolin-1-rich granule membrane	-4.05651	-1.72949	8/61	101,1823,2357,5799,7226,10288,83858,84658	ADAM8,DSC1,FPR1,PTPRN2,TRPM2,LILRB2,ATAD3B,ADGRE3
	5_Member	GO Cellular Components	GO:0070820	tertiary granule	-3.27888	-1.11157	12/164	101,1535,1823,2357,5799,5806,7226,10288,10394,83858,84658,160364	ADAM8,CYBA,DSC1,FPR1,PTPRN2,PTX3,TRPM2,LILRB2,PRG3,ATAD3B,ADGRE3,CLEC12A
	5_Member	GO Cellular Components	GO:0030667	secretory granule membrane	-2.59913	-0.679597	16/305	101,1535,1650,1823,2357,3106,3107,5799,7226,10288,10788,63910,83858,84658,160364,340061	ADAM8,CYBA,DDOST,DSC1,FPR1,HLA-B,HLA-C,PTPRN2,TRPM2,LILRB2,IQGAP2,SLC17A9,ATAD3B,ADGRE3,CLEC12A,STING1
6_Summary		GO Cellular Components	GO:0015629	actin cytoskeleton	-3.02912	-0.893988	24/503	101,824,1627,4046,4486,4650,4703,5829,6339,8476,9001,9696,10411,10487,10699,10788,11078,25861,51332,56928,85456,91977,92922,171024	ADAM8,CAPN2,DBN1,LSP1,MST1R,MYO9B,NEB,PXN,SCNN1D,CDC42BPA,HAP1,CROCC,RAPGEF3,CAP1,CORIN,IQGAP2,TRIOBP,WHRN,SPTBN5,SPPL2B,TNKS1BP1,MYOZ3,CCDC102A,SYNPO2
	6_Member	GO Cellular Components	GO:0015629	actin cytoskeleton	-3.02912	-0.893988	24/503	101,824,1627,4046,4486,4650,4703,5829,6339,8476,9001,9696,10411,10487,10699,10788,11078,25861,51332,56928,85456,91977,92922,171024	ADAM8,CAPN2,DBN1,LSP1,MST1R,MYO9B,NEB,PXN,SCNN1D,CDC42BPA,HAP1,CROCC,RAPGEF3,CAP1,CORIN,IQGAP2,TRIOBP,WHRN,SPTBN5,SPPL2B,TNKS1BP1,MYOZ3,CCDC102A,SYNPO2
7_Summary		GO Cellular Components	GO:0016324	apical plasma membrane	-2.7186	-0.759556	18/353	2335,5213,9963,23370,53841,54825,55630,55686,57710,79981,80736,83959,89766,91703,140453,200958,286204,348932,51332	FN1,PFKM,SLC23A1,ARHGEF18,CDHR5,CDHR2,SLC39A4,MREG,KIAA1614,FRMD1,SLC44A4,SLC4A11,UMODL1,ACY3,MUC17,MUC20,CRB2,SLC6A18,SPTBN5
	7_Member	GO Cellular Components	GO:0016324	apical plasma membrane	-2.7186	-0.759556	18/353	2335,5213,9963,23370,53841,54825,55630,55686,57710,79981,80736,83959,89766,91703,140453,200958,286204,348932	FN1,PFKM,SLC23A1,ARHGEF18,CDHR5,CDHR2,SLC39A4,MREG,KIAA1614,FRMD1,SLC44A4,SLC4A11,UMODL1,ACY3,MUC17,MUC20,CRB2,SLC6A18
	7_Member	GO Cellular Components	GO:0045177	apical part of cell	-2.31297	-0.50883	19/416	2335,5213,9963,23370,51332,53841,54825,55630,55686,57710,79981,80736,83959,89766,91703,140453,200958,286204,348932	FN1,PFKM,SLC23A1,ARHGEF18,SPTBN5,CDHR5,CDHR2,SLC39A4,MREG,KIAA1614,FRMD1,SLC44A4,SLC4A11,UMODL1,ACY3,MUC17,MUC20,CRB2,SLC6A18
8_Summary		GO Cellular Components	GO:0005759	mitochondrial matrix	-2.65345	-0.714609	22/476	1892,2356,2617,2653,2926,5442,5625,10965,23479,25824,26073,27068,51081,54516,55526,55794,60314,116447,117145,123876,128240,644096	ECHS1,FPGS,GARS1,GCSH,GRSF1,POLRMT,PRODH,ACOT2,ISCU,PRDX5,POLDIP2,PPA2,MRPS7,MTRF1L,DHTKD1,DDX28,MYG1,TOP1MT,THEM4,ACSM2A,NAXE,SDHAF1
	8_Member	GO Cellular Components	GO:0005759	mitochondrial matrix	-2.65345	-0.714609	22/476	1892,2356,2617,2653,2926,5442,5625,10965,23479,25824,26073,27068,51081,54516,55526,55794,60314,116447,117145,123876,128240,644096	ECHS1,FPGS,GARS1,GCSH,GRSF1,POLRMT,PRODH,ACOT2,ISCU,PRDX5,POLDIP2,PPA2,MRPS7,MTRF1L,DHTKD1,DDX28,MYG1,TOP1MT,THEM4,ACSM2A,NAXE,SDHAF1
	8_Member	GO Cellular Components	GO:0009295	nucleoid	-2.44359	-0.587196	5/44	2926,5442,26073,55794,116447	GRSF1,POLRMT,POLDIP2,DDX28,TOP1MT
	8_Member	GO Cellular Components	GO:0042645	mitochondrial nucleoid	-2.44359	-0.587196	5/44	2926,5442,26073,55794,116447	GRSF1,POLRMT,POLDIP2,DDX28,TOP1MT
9_Summary		GO Cellular Components	GO:0031045	dense core granule	-2.34632	-0.527461	4/29	101,4985,8938,9152	ADAM8,OPRD1,BAIAP3,SLC6A5
	9_Member	GO Cellular Components	GO:0031045	dense core granule	-2.34632	-0.527461	4/29	101,4985,8938,9152	ADAM8,OPRD1,BAIAP3,SLC6A5
10_Summary		GO Cellular Components	GO:0031514	motile cilium	-2.08151	-0.33173	11/201	1043,6865,9696,10566,26762,64446,79819,130540,257062,259289,285335	CD52,TACR2,CROCC,AKAP3,HAVCR1,DNAI2,DNAI4,FLACC1,CATSPERD,TAS2R43,SLC9C1
	10_Member	GO Cellular Components	GO:0031514	motile cilium	-2.08151	-0.33173	11/201	1043,6865,9696,10566,26762,64446,79819,130540,257062,259289,285335	CD52,TACR2,CROCC,AKAP3,HAVCR1,DNAI2,DNAI4,FLACC1,CATSPERD,TAS2R43,SLC9C1
11_Summary		GO Cellular Components	GO:0005773	vacuole	-2.06854	-0.331349	30/799	53,101,824,1650,2357,3074,3115,3123,3339,3425,4486,4669,6382,7226,8408,9001,10487,23208,23526,55686,55850,56928,57535,57707,96459,112937,114990,283554,340061,400668	ACP2,ADAM8,CAPN2,DDOST,FPR1,HEXB,HLA-DPB1,HLA-DRB1,HSPG2,IDUA,MST1R,NAGLU,SDC1,TRPM2,ULK1,HAP1,CAP1,SYT11,ARHGAP45,MREG,USE1,SPPL2B,ELAPOR1,MEAK7,FNIP1,GLB1L3,VASN,GPR137C,STING1,PRSS57
	11_Member	GO Cellular Components	GO:0005773	vacuole	-2.06854	-0.331349	30/799	53,101,824,1650,2357,3074,3115,3123,3339,3425,4486,4669,6382,7226,8408,9001,10487,23208,23526,55686,55850,56928,57535,57707,96459,112937,114990,283554,340061,400668	ACP2,ADAM8,CAPN2,DDOST,FPR1,HEXB,HLA-DPB1,HLA-DRB1,HSPG2,IDUA,MST1R,NAGLU,SDC1,TRPM2,ULK1,HAP1,CAP1,SYT11,ARHGAP45,MREG,USE1,SPPL2B,ELAPOR1,MEAK7,FNIP1,GLB1L3,VASN,GPR137C,STING1,PRSS57
12_Summary		GO Cellular Components	GO:0032420	stereocilium	-2.02935	-0.306958	5/55	11078,25861,64072,84059,339768	TRIOBP,WHRN,CDH23,ADGRV1,ESPNL
	12_Member	GO Cellular Components	GO:0032420	stereocilium	-2.02935	-0.306958	5/55	11078,25861,64072,84059,339768	TRIOBP,WHRN,CDH23,ADGRV1,ESPNL

## Sheet: MF
Supplementary Table 5. Enrichment of GO terms and KEGG pathways of MRONJ-associated genes.
GroupID		Category	Term	Description	LogP	Log(q-value)	InTerm_InList	Genes	Symbols
1_Summary		GO Molecular Functions	GO:0005201	extracellular matrix structural constituent	-4.89489	-1.56617	15/170	1277,1278,2199,2335,3339,3911,4584,4586,10394,11117,83872,89766,127435,140453,256158,3123,3861,4703,5719,7053,7273,8687,8736,9696,9883,51081,84033	COL1A1,COL1A2,FBLN2,FN1,HSPG2,LAMA5,MUC3A,MUC5AC,PRG3,EMILIN1,HMCN1,UMODL1,PODN,MUC17,HMCN2,HLA-DRB1,KRT14,NEB,PSMD13,TGM3,TTN,KRT38,MYOM1,CROCC,POM121,MRPS7,OBSCN
	1_Member	GO Molecular Functions	GO:0005201	extracellular matrix structural constituent	-4.89489	-1.56617	15/170	1277,1278,2199,2335,3339,3911,4584,4586,10394,11117,83872,89766,127435,140453,256158	COL1A1,COL1A2,FBLN2,FN1,HSPG2,LAMA5,MUC3A,MUC5AC,PRG3,EMILIN1,HMCN1,UMODL1,PODN,MUC17,HMCN2
	1_Member	GO Molecular Functions	GO:0005198	structural molecule activity	-2.02599	0	27/704	1277,1278,2199,2335,3123,3339,3861,3911,4584,4586,4703,5719,7053,7273,8687,8736,9696,9883,10394,11117,51081,83872,84033,89766,127435,140453,256158	COL1A1,COL1A2,FBLN2,FN1,HLA-DRB1,HSPG2,KRT14,LAMA5,MUC3A,MUC5AC,NEB,PSMD13,TGM3,TTN,KRT38,MYOM1,CROCC,POM121,PRG3,EMILIN1,MRPS7,HMCN1,OBSCN,UMODL1,PODN,MUC17,HMCN2
2_Summary		GO Molecular Functions	GO:0004984	olfactory receptor activity	-4.88793	-1.56617	26/430	26333,26533,79544,81472,127064,127077,135941,219870,219959,254973,338662,338751,390058,390264,390265,390538,391189,391190,391195,391196,392390,401666,401994,403257,441669,442361	OR7A17,OR10G3,OR4K1,OR2C3,OR2T12,OR2T11,OR2A14,OR10G9,OR1S1,OR1L4,OR8D4,OR52L1,OR51B6,OR10G4,OR10G7,OR4M2,OR11L1,OR2L8,OR2T33,OR2M7,OR1L6,OR51A4,OR14I1,OR4C45,OR4Q3,OR2A2
	2_Member	GO Molecular Functions	GO:0004984	olfactory receptor activity	-4.88793	-1.56617	26/430	26333,26533,79544,81472,127064,127077,135941,219870,219959,254973,338662,338751,390058,390264,390265,390538,391189,391190,391195,391196,392390,401666,401994,403257,441669,442361	OR7A17,OR10G3,OR4K1,OR2C3,OR2T12,OR2T11,OR2A14,OR10G9,OR1S1,OR1L4,OR8D4,OR52L1,OR51B6,OR10G4,OR10G7,OR4M2,OR11L1,OR2L8,OR2T33,OR2M7,OR1L6,OR51A4,OR14I1,OR4C45,OR4Q3,OR2A2
3_Summary		GO Molecular Functions	GO:0005509	calcium ion binding	-4.76189	-1.56617	36/713	26,101,774,824,1013,1823,2161,2195,2196,2199,3339,5408,7053,7226,7273,8938,9620,11253,23140,23208,26167,53841,54825,56128,57190,64072,83872,84059,84658,89766,114780,117286,120114,256158,283229,286204	AOC1,ADAM8,CACNA1B,CAPN2,CDH15,DSC1,F12,FAT1,FAT2,FBLN2,HSPG2,PNLIPRP2,TGM3,TRPM2,TTN,BAIAP3,CELSR1,MAN1B1,ZZEF1,SYT11,PCDHB5,CDHR5,CDHR2,PCDHB8,SELENON,CDH23,HMCN1,ADGRV1,ADGRE3,UMODL1,PKD1L2,CIB3,FAT3,HMCN2,CRACR2B,CRB2
	3_Member	GO Molecular Functions	GO:0005509	calcium ion binding	-4.76189	-1.56617	36/713	26,101,774,824,1013,1823,2161,2195,2196,2199,3339,5408,7053,7226,7273,8938,9620,11253,23140,23208,26167,53841,54825,56128,57190,64072,83872,84059,84658,89766,114780,117286,120114,256158,283229,286204	AOC1,ADAM8,CACNA1B,CAPN2,CDH15,DSC1,F12,FAT1,FAT2,FBLN2,HSPG2,PNLIPRP2,TGM3,TRPM2,TTN,BAIAP3,CELSR1,MAN1B1,ZZEF1,SYT11,PCDHB5,CDHR5,CDHR2,PCDHB8,SELENON,CDH23,HMCN1,ADGRV1,ADGRE3,UMODL1,PKD1L2,CIB3,FAT3,HMCN2,CRACR2B,CRB2
4_Summary		GO Molecular Functions	GO:0005262	calcium channel activity	-3.95985	-0.889077	11/118	774,4308,7226,8911,8912,80036,114780,162514,168507,255022,342372,3768,5027,6339,83959,119395,441168,100134444,6534,9152,9963,55630,285335,83862,2700,6572,80736	CACNA1B,TRPM1,TRPM2,CACNA1I,CACNA1H,TRPM3,PKD1L2,TRPV3,PKD1L1,CALHM1,PKD1L3,KCNJ12,P2RX7,SCNN1D,SLC4A11,CALHM3,CALHM6,KCNJ18,SLC6A7,SLC6A5,SLC23A1,SLC39A4,SLC9C1,TMEM120A,GJA3,SLC18A3,SLC44A4
	4_Member	GO Molecular Functions	GO:0005262	calcium channel activity	-3.95985	-0.889077	11/118	774,4308,7226,8911,8912,80036,114780,162514,168507,255022,342372	CACNA1B,TRPM1,TRPM2,CACNA1I,CACNA1H,TRPM3,PKD1L2,TRPV3,PKD1L1,CALHM1,PKD1L3
	4_Member	GO Molecular Functions	GO:0015085	calcium ion transmembrane transporter activity	-3.47312	-0.645386	11/134	774,4308,7226,8911,8912,80036,114780,162514,168507,255022,342372	CACNA1B,TRPM1,TRPM2,CACNA1I,CACNA1H,TRPM3,PKD1L2,TRPV3,PKD1L1,CALHM1,PKD1L3
	4_Member	GO Molecular Functions	GO:0005261	cation channel activity	-2.98479	-0.425894	18/334	774,3768,4308,5027,6339,7226,8911,8912,80036,83959,114780,119395,162514,168507,255022,342372,441168,100134444	CACNA1B,KCNJ12,TRPM1,P2RX7,SCNN1D,TRPM2,CACNA1I,CACNA1H,TRPM3,SLC4A11,PKD1L2,CALHM3,TRPV3,PKD1L1,CALHM1,PKD1L3,CALHM6,KCNJ18
	4_Member	GO Molecular Functions	GO:0046873	metal ion transmembrane transporter activity	-2.53925	-0.145168	20/426	774,3768,4308,6339,6534,7226,8911,8912,9152,9963,55630,80036,83959,114780,162514,168507,255022,285335,342372,100134444	CACNA1B,KCNJ12,TRPM1,SCNN1D,SLC6A7,TRPM2,CACNA1I,CACNA1H,SLC6A5,SLC23A1,SLC39A4,TRPM3,SLC4A11,PKD1L2,TRPV3,PKD1L1,CALHM1,SLC9C1,PKD1L3,KCNJ18
	4_Member	GO Molecular Functions	GO:0005272	sodium channel activity	-2.48764	-0.140698	5/43	6339,7226,8911,8912,83959	SCNN1D,TRPM2,CACNA1I,CACNA1H,SLC4A11
	4_Member	GO Molecular Functions	GO:0005216	ion channel activity	-2.47111	-0.140698	20/432	774,3768,4308,5027,6339,7226,8911,8912,80036,83862,83959,114780,119395,162514,168507,255022,285335,342372,441168,100134444	CACNA1B,KCNJ12,TRPM1,P2RX7,SCNN1D,TRPM2,CACNA1I,CACNA1H,TRPM3,TMEM120A,SLC4A11,PKD1L2,CALHM3,TRPV3,PKD1L1,CALHM1,SLC9C1,PKD1L3,CALHM6,KCNJ18
	4_Member	GO Molecular Functions	GO:0015267	channel activity	-2.27671	-0.00226622	21/481	774,2700,3768,4308,5027,6339,7226,8911,8912,80036,83862,83959,114780,119395,162514,168507,255022,285335,342372,441168,100134444	CACNA1B,GJA3,KCNJ12,TRPM1,P2RX7,SCNN1D,TRPM2,CACNA1I,CACNA1H,TRPM3,TMEM120A,SLC4A11,PKD1L2,CALHM3,TRPV3,PKD1L1,CALHM1,SLC9C1,PKD1L3,CALHM6,KCNJ18
	4_Member	GO Molecular Functions	GO:0022803	passive transmembrane transporter activity	-2.26672	-0.00226622	21/482	774,2700,3768,4308,5027,6339,7226,8911,8912,80036,83862,83959,114780,119395,162514,168507,255022,285335,342372,441168,100134444	CACNA1B,GJA3,KCNJ12,TRPM1,P2RX7,SCNN1D,TRPM2,CACNA1I,CACNA1H,TRPM3,TMEM120A,SLC4A11,PKD1L2,CALHM3,TRPV3,PKD1L1,CALHM1,SLC9C1,PKD1L3,CALHM6,KCNJ18
	4_Member	GO Molecular Functions	GO:0015081	sodium ion transmembrane transporter activity	-2.10846	0	9/146	6339,6534,7226,8911,8912,9152,9963,83959,285335	SCNN1D,SLC6A7,TRPM2,CACNA1I,CACNA1H,SLC6A5,SLC23A1,SLC4A11,SLC9C1
	4_Member	GO Molecular Functions	GO:0008324	cation transmembrane transporter activity	-2.08723	0	25/630	774,3768,4308,5027,6339,6534,6572,7226,8911,8912,9152,9963,55630,80036,80736,83959,114780,119395,162514,168507,255022,285335,342372,441168,100134444	CACNA1B,KCNJ12,TRPM1,P2RX7,SCNN1D,SLC6A7,SLC18A3,TRPM2,CACNA1I,CACNA1H,SLC6A5,SLC23A1,SLC39A4,TRPM3,SLC44A4,SLC4A11,PKD1L2,CALHM3,TRPV3,PKD1L1,CALHM1,SLC9C1,PKD1L3,CALHM6,KCNJ18
5_Summary		GO Molecular Functions	GO:0004175	endopeptidase activity	-3.84822	-0.874357	24/441	101,824,2161,3083,3426,4485,5046,7177,9700,10699,11132,11173,11223,23430,56928,57602,57663,79747,81794,113791,118856,283471,392197,400668,8532,114294,124975,161725	ADAM8,CAPN2,F12,HGFAC,CFI,MST1,PCSK6,TPSAB1,ESPL1,CORIN,CAPN10,ADAMTS7,MST1L,TPSD1,SPPL2B,USP36,USP29,ADGB,ADAMTS10,PIK3IP1,MMP21,TMPRSS12,USP17L7,PRSS57,CPZ,LACTB,GGT6,OTUD7A
	5_Member	GO Molecular Functions	GO:0004175	endopeptidase activity	-3.84822	-0.874357	24/441	101,824,2161,3083,3426,4485,5046,7177,9700,10699,11132,11173,11223,23430,56928,57602,57663,79747,81794,113791,118856,283471,392197,400668	ADAM8,CAPN2,F12,HGFAC,CFI,MST1,PCSK6,TPSAB1,ESPL1,CORIN,CAPN10,ADAMTS7,MST1L,TPSD1,SPPL2B,USP36,USP29,ADGB,ADAMTS10,PIK3IP1,MMP21,TMPRSS12,USP17L7,PRSS57
	5_Member	GO Molecular Functions	GO:0004252	serine-type endopeptidase activity	-3.69188	-0.797195	13/170	101,2161,3083,3426,4485,5046,7177,10699,11223,23430,113791,283471,400668	ADAM8,F12,HGFAC,CFI,MST1,PCSK6,TPSAB1,CORIN,MST1L,TPSD1,PIK3IP1,TMPRSS12,PRSS57
	5_Member	GO Molecular Functions	GO:0008236	serine-type peptidase activity	-3.26973	-0.508953	13/188	101,2161,3083,3426,4485,5046,7177,10699,11223,23430,113791,283471,400668	ADAM8,F12,HGFAC,CFI,MST1,PCSK6,TPSAB1,CORIN,MST1L,TPSD1,PIK3IP1,TMPRSS12,PRSS57
	5_Member	GO Molecular Functions	GO:0017171	serine hydrolase activity	-3.22643	-0.508953	13/190	101,2161,3083,3426,4485,5046,7177,10699,11223,23430,113791,283471,400668	ADAM8,F12,HGFAC,CFI,MST1,PCSK6,TPSAB1,CORIN,MST1L,TPSD1,PIK3IP1,TMPRSS12,PRSS57
	5_Member	GO Molecular Functions	GO:0008233	peptidase activity	-2.89316	-0.396412	28/637	101,824,2161,3083,3426,4485,5046,7177,8532,9700,10699,11132,11173,11223,23430,56928,57602,57663,79747,81794,113791,114294,118856,124975,161725,283471,392197,400668	ADAM8,CAPN2,F12,HGFAC,CFI,MST1,PCSK6,TPSAB1,CPZ,ESPL1,CORIN,CAPN10,ADAMTS7,MST1L,TPSD1,SPPL2B,USP36,USP29,ADGB,ADAMTS10,PIK3IP1,LACTB,MMP21,GGT6,OTUD7A,TMPRSS12,USP17L7,PRSS57
6_Summary		GO Molecular Functions	GO:0046977	TAP binding	-3.17851	-0.508953	3/8	3105,3106,3107,3115,3123	HLA-A,HLA-B,HLA-C,HLA-DPB1,HLA-DRB1
	6_Member	GO Molecular Functions	GO:0046977	TAP binding	-3.17851	-0.508953	3/8	3105,3106,3107	HLA-A,HLA-B,HLA-C
	6_Member	GO Molecular Functions	GO:0042605	peptide antigen binding	-2.95136	-0.424653	5/34	3105,3106,3107,3115,3123	HLA-A,HLA-B,HLA-C,HLA-DPB1,HLA-DRB1
7_Summary		GO Molecular Functions	GO:0008527	taste receptor activity	-3.1404	-0.508953	5/31	83756,259289,259295,342372,353164	TAS1R3,TAS2R43,TAS2R20,PKD1L3,TAS2R42
	7_Member	GO Molecular Functions	GO:0008527	taste receptor activity	-3.1404	-0.508953	5/31	83756,259289,259295,342372,353164	TAS1R3,TAS2R43,TAS2R20,PKD1L3,TAS2R42
8_Summary		GO Molecular Functions	GO:0045503	dynein light chain binding	-3.01007	-0.425894	3/9	64446,79819,89891	DNAI2,DNAI4,DYNC2I2
	8_Member	GO Molecular Functions	GO:0045503	dynein light chain binding	-3.01007	-0.425894	3/9	64446,79819,89891	DNAI2,DNAI4,DYNC2I2
	8_Member	GO Molecular Functions	GO:0045504	dynein heavy chain binding	-2.50847	-0.140698	3/13	64446,79819,89891	DNAI2,DNAI4,DYNC2I2
9_Summary		GO Molecular Functions	GO:0019838	growth factor binding	-2.79273	-0.324017	10/138	1277,1278,1490,2324,3486,3587,5046,9001,25987,114990	COL1A1,COL1A2,CCN2,FLT4,IGFBP3,IL10RA,PCSK6,HAP1,TSKU,VASN
	9_Member	GO Molecular Functions	GO:0019838	growth factor binding	-2.79273	-0.324017	10/138	1277,1278,1490,2324,3486,3587,5046,9001,25987,114990	COL1A1,COL1A2,CCN2,FLT4,IGFBP3,IL10RA,PCSK6,HAP1,TSKU,VASN
10_Summary		GO Molecular Functions	GO:0097493	structural molecule activity conferring elasticity	-2.73213	-0.289738	3/11	2199,7273,11117	FBLN2,TTN,EMILIN1
	10_Member	GO Molecular Functions	GO:0097493	structural molecule activity conferring elasticity	-2.73213	-0.289738	3/11	2199,7273,11117	FBLN2,TTN,EMILIN1
11_Summary		GO Molecular Functions	GO:0030247	polysaccharide binding	-2.58773	-0.170164	4/25	3123,5806,348174,648791	HLA-DRB1,PTX3,CLEC18A,PPP1R3G
	11_Member	GO Molecular Functions	GO:0030247	polysaccharide binding	-2.58773	-0.170164	4/25	3123,5806,348174,648791	HLA-DRB1,PTX3,CLEC18A,PPP1R3G
12_Summary		GO Molecular Functions	GO:0051015	actin filament binding	-2.35415	-0.043046	12/211	752,1627,4703,7273,7287,8736,10788,11078,51332,127294,339768,390594	FMNL1,DBN1,NEB,TTN,TULP1,MYOM1,IQGAP2,TRIOBP,SPTBN5,MYOM3,ESPNL,KBTBD13
	12_Member	GO Molecular Functions	GO:0051015	actin filament binding	-2.35415	-0.043046	12/211	752,1627,4703,7273,7287,8736,10788,11078,51332,127294,339768,390594	FMNL1,DBN1,NEB,TTN,TULP1,MYOM1,IQGAP2,TRIOBP,SPTBN5,MYOM3,ESPNL,KBTBD13
13_Summary		GO Molecular Functions	GO:0060589	nucleoside-triphosphatase regulator activity	-2.26013	-0.00226622	22/514	153,573,1793,1936,4650,10411,10788,11033,22899,23370,23380,23526,26092,55160,57580,84033,96459,119385,146923,153478,653489,100271715	ADRB1,BAG1,DOCK1,EEF1D,MYO9B,RAPGEF3,IQGAP2,ADAP1,ARHGEF15,ARHGEF18,SRGAP2,ARHGAP45,TOR1AIP1,ARHGEF10L,PREX1,OBSCN,FNIP1,AGAP11,RUNDC1,PLEKHG4B,RGPD3,ARHGEF33
	13_Member	GO Molecular Functions	GO:0060589	nucleoside-triphosphatase regulator activity	-2.26013	-0.00226622	22/514	153,573,1793,1936,4650,10411,10788,11033,22899,23370,23380,23526,26092,55160,57580,84033,96459,119385,146923,153478,653489,100271715	ADRB1,BAG1,DOCK1,EEF1D,MYO9B,RAPGEF3,IQGAP2,ADAP1,ARHGEF15,ARHGEF18,SRGAP2,ARHGAP45,TOR1AIP1,ARHGEF10L,PREX1,OBSCN,FNIP1,AGAP11,RUNDC1,PLEKHG4B,RGPD3,ARHGEF33
	13_Member	GO Molecular Functions	GO:0005085	guanyl-nucleotide exchange factor activity	-2.12821	0	11/198	153,1793,1936,10411,22899,23370,57580,84033,96459,153478,100271715	ADRB1,DOCK1,EEF1D,RAPGEF3,ARHGEF15,ARHGEF18,PREX1,OBSCN,FNIP1,PLEKHG4B,ARHGEF33
	13_Member	GO Molecular Functions	GO:0030695	GTPase regulator activity	-2.07756	0	20/470	153,1793,1936,4650,10411,10788,11033,22899,23370,23380,23526,55160,57580,84033,96459,119385,146923,153478,653489,100271715	ADRB1,DOCK1,EEF1D,MYO9B,RAPGEF3,IQGAP2,ADAP1,ARHGEF15,ARHGEF18,SRGAP2,ARHGAP45,ARHGEF10L,PREX1,OBSCN,FNIP1,AGAP11,RUNDC1,PLEKHG4B,RGPD3,ARHGEF33
14_Summary		GO Molecular Functions	GO:0004198	calcium-dependent cysteine-type endopeptidase activity	-2.16266	0	3/17	824,11132,79747	CAPN2,CAPN10,ADGB
	14_Member	GO Molecular Functions	GO:0004198	calcium-dependent cysteine-type endopeptidase activity	-2.16266	0	3/17	824,11132,79747	CAPN2,CAPN10,ADGB
15_Summary		GO Molecular Functions	GO:0016755	transferase activity, transferring amino-acyl groups	-2.09104	0	3/18	7053,124975,343641	TGM3,GGT6,TGM6
	15_Member	GO Molecular Functions	GO:0016755	transferase activity, transferring amino-acyl groups	-2.09104	0	3/18	7053,124975,343641	TGM3,GGT6,TGM6

## Sheet: Kegg
Supplementary Table 5. Enrichment of GO terms and KEGG pathways of MRONJ-associated genes.
GroupID		Category	Term	Description	LogP	Log(q-value)	InTerm_InList	Genes	Symbols
1_Summary		KEGG Pathway	hsa04740	Olfactory transduction	-5.08481	-2.39152	26/419	26333,26533,79544,81472,127064,127077,135941,219870,219959,254973,338662,338751,390058,390264,390265,390538,391189,391190,391195,391196,392390,401666,401994,403257,441669,442361	OR7A17,OR10G3,OR4K1,OR2C3,OR2T12,OR2T11,OR2A14,OR10G9,OR1S1,OR1L4,OR8D4,OR52L1,OR51B6,OR10G4,OR10G7,OR4M2,OR11L1,OR2L8,OR2T33,OR2M7,OR1L6,OR51A4,OR14I1,OR4C45,OR4Q3,OR2A2
	1_Member	KEGG Pathway	hsa04740	Olfactory transduction	-5.08481	-2.39152	26/419	26333,26533,79544,81472,127064,127077,135941,219870,219959,254973,338662,338751,390058,390264,390265,390538,391189,391190,391195,391196,392390,401666,401994,403257,441669,442361	OR7A17,OR10G3,OR4K1,OR2C3,OR2T12,OR2T11,OR2A14,OR10G9,OR1S1,OR1L4,OR8D4,OR52L1,OR51B6,OR10G4,OR10G7,OR4M2,OR11L1,OR2L8,OR2T33,OR2M7,OR1L6,OR51A4,OR14I1,OR4C45,OR4Q3,OR2A2
	1_Member	KEGG Pathway	ko04740	Olfactory transduction	-5.08481	-2.39152	26/419	26333,26533,79544,81472,127064,127077,135941,219870,219959,254973,338662,338751,390058,390264,390265,390538,391189,391190,391195,391196,392390,401666,401994,403257,441669,442361	OR7A17,OR10G3,OR4K1,OR2C3,OR2T12,OR2T11,OR2A14,OR10G9,OR1S1,OR1L4,OR8D4,OR52L1,OR51B6,OR10G4,OR10G7,OR4M2,OR11L1,OR2L8,OR2T33,OR2M7,OR1L6,OR51A4,OR14I1,OR4C45,OR4Q3,OR2A2
2_Summary		KEGG Pathway	hsa05320	Autoimmune thyroid disease	-3.63511	-1.24285	7/53	1493,3105,3106,3107,3115,3123,3441,5799,3822,4261,1981,1013,6382,84628	CTLA4,HLA-A,HLA-B,HLA-C,HLA-DPB1,HLA-DRB1,IFNA4,PTPRN2,KLRC2,CIITA,EIF4G1,CDH15,SDC1,NTNG2
	2_Member	KEGG Pathway	hsa05320	Autoimmune thyroid disease	-3.63511	-1.24285	7/53	1493,3105,3106,3107,3115,3123,3441	CTLA4,HLA-A,HLA-B,HLA-C,HLA-DPB1,HLA-DRB1,IFNA4
	2_Member	KEGG Pathway	ko05320	Autoimmune thyroid disease	-3.63511	-1.24285	7/53	1493,3105,3106,3107,3115,3123,3441	CTLA4,HLA-A,HLA-B,HLA-C,HLA-DPB1,HLA-DRB1,IFNA4
	2_Member	KEGG Pathway	hsa04940	Type I diabetes mellitus	-3.3191	-1.10294	6/43	3105,3106,3107,3115,3123,5799	HLA-A,HLA-B,HLA-C,HLA-DPB1,HLA-DRB1,PTPRN2
	2_Member	KEGG Pathway	ko04940	Type I diabetes mellitus	-3.3191	-1.10294	6/43	3105,3106,3107,3115,3123,5799	HLA-A,HLA-B,HLA-C,HLA-DPB1,HLA-DRB1,PTPRN2
	2_Member	KEGG Pathway	hsa05330	Allograft rejection	-2.72866	-0.815814	5/38	3105,3106,3107,3115,3123	HLA-A,HLA-B,HLA-C,HLA-DPB1,HLA-DRB1
	2_Member	KEGG Pathway	ko05330	Allograft rejection	-2.72866	-0.815814	5/38	3105,3106,3107,3115,3123	HLA-A,HLA-B,HLA-C,HLA-DPB1,HLA-DRB1
	2_Member	KEGG Pathway	hsa04612	Antigen processing and presentation	-2.65213	-0.815814	7/77	3105,3106,3107,3115,3123,3822,4261	HLA-A,HLA-B,HLA-C,HLA-DPB1,HLA-DRB1,KLRC2,CIITA
	2_Member	KEGG Pathway	ko04612	Antigen processing and presentation	-2.65213	-0.815814	7/77	3105,3106,3107,3115,3123,3822,4261	HLA-A,HLA-B,HLA-C,HLA-DPB1,HLA-DRB1,KLRC2,CIITA
	2_Member	KEGG Pathway	hsa05416	Viral myocarditis	-2.58786	-0.815814	6/59	1981,3105,3106,3107,3115,3123	EIF4G1,HLA-A,HLA-B,HLA-C,HLA-DPB1,HLA-DRB1
	2_Member	KEGG Pathway	hsa05332	Graft-versus-host disease	-2.57968	-0.815814	5/41	3105,3106,3107,3115,3123	HLA-A,HLA-B,HLA-C,HLA-DPB1,HLA-DRB1
	2_Member	KEGG Pathway	ko05332	Graft-versus-host disease	-2.57968	-0.815814	5/41	3105,3106,3107,3115,3123	HLA-A,HLA-B,HLA-C,HLA-DPB1,HLA-DRB1
	2_Member	KEGG Pathway	hsa04514	Cell adhesion molecules (CAMs)	-2.1462	-0.452915	9/144	1013,1493,3105,3106,3107,3115,3123,6382,84628	CDH15,CTLA4,HLA-A,HLA-B,HLA-C,HLA-DPB1,HLA-DRB1,SDC1,NTNG2
	2_Member	KEGG Pathway	ko04514	Cell adhesion molecules (CAMs)	-2.1462	-0.452915	9/144	1013,1493,3105,3106,3107,3115,3123,6382,84628	CDH15,CTLA4,HLA-A,HLA-B,HLA-C,HLA-DPB1,HLA-DRB1,SDC1,NTNG2
3_Summary		KEGG Pathway	hsa04512	ECM-receptor interaction	-3.16072	-1.06949	8/82	1277,1278,2335,3339,3911,6382,22801,51206	COL1A1,COL1A2,FN1,HSPG2,LAMA5,SDC1,ITGA11,GP6
	3_Member	KEGG Pathway	hsa04512	ECM-receptor interaction	-3.16072	-1.06949	8/82	1277,1278,2335,3339,3911,6382,22801,51206	COL1A1,COL1A2,FN1,HSPG2,LAMA5,SDC1,ITGA11,GP6
	3_Member	KEGG Pathway	ko04512	ECM-receptor interaction	-3.16072	-1.06949	8/82	1277,1278,2335,3339,3911,6382,22801,51206	COL1A1,COL1A2,FN1,HSPG2,LAMA5,SDC1,ITGA11,GP6
4_Summary		KEGG Pathway	hsa00340	Histidine metabolism	-2.65539	-0.815814	4/24	26,222,3034,144193	AOC1,ALDH3B2,HAL,AMDHD1
	4_Member	KEGG Pathway	hsa00340	Histidine metabolism	-2.65539	-0.815814	4/24	26,222,3034,144193	AOC1,ALDH3B2,HAL,AMDHD1
	4_Member	KEGG Pathway	ko00340	Histidine metabolism	-2.65539	-0.815814	4/24	26,222,3034,144193	AOC1,ALDH3B2,HAL,AMDHD1
5_Summary		KEGG Pathway	hsa00062	Fatty acid elongation	-2.40275	-0.663701	4/28	1892,9200,10965,117145	ECHS1,HACD1,ACOT2,THEM4
	5_Member	KEGG Pathway	hsa00062	Fatty acid elongation	-2.40275	-0.663701	4/28	1892,9200,10965,117145	ECHS1,HACD1,ACOT2,THEM4
6_Summary		KEGG Pathway	hsa00531	Glycosaminoglycan degradation	-2.02396	-0.372067	3/19	3074,3425,4669	HEXB,IDUA,NAGLU
	6_Member	KEGG Pathway	hsa00531	Glycosaminoglycan degradation	-2.02396	-0.372067	3/19	3074,3425,4669	HEXB,IDUA,NAGLU
	6_Member	KEGG Pathway	ko00531	Glycosaminoglycan degradation	-2.02396	-0.372067	3/19	3074,3425,4669	HEXB,IDUA,NAGLU
